# Supplementary material for: When does aggregation matter? The CLUMP scheme for classifying nanoparticles based on the influence of aggregation on environmental fate
Source: Royal Society of Chemistry journal article supplement (doi:10.1039/d5en00950b), 2025-12-23
Supplement: d5en00950b3.xlsx [file d5en00950b3.xlsx]

## Sheet: Information
SUPPORTING INFORMATION (SI C)
When does the aggregation matter? The CLUMP scheme for classifying nanoparticles based on the influence of aggregation on environmental fate
Szymon Swiatek Brzezinski, Michal Kalapus, and Tomasz Puzyn*
Laboratory of Environmental Chemoinformatics, Faculty of Chemistry, University of Gdańsk, 80-308 Gdańsk, Poland
* tomasz.puzyn@ug.edu.pl
Dataset Description
This dataset contains the detailed CLUMP classification matrices for the 36 engineered nanoparticles analyzed in the study. Each matrix represents a specific nanomaterial. The cells within the matrix indicate the assigned CLUMP class for a specific combination of: *ENP Diameter (nm), *Zeta Potential (mV). The assignment is based on the Probability of Aggregation Dominance (D_agg), calculated usin…
CLUMP Classification Legend
The CLUMP system categorizes nanoforms based on the frequency (%) with which heteroaggregation dominates over other removal processes (sedimentation, dissolution, advection) across 10,000 environmental scenarios.
C (Consistently): D_agg = 100%
L (Largely): 75% <= D_agg < 100%
U (Usually): 50% <= D_agg < 75%
M (Moderately): 25% <= D_agg < 50%
P (Poorly): D_agg < 25%

## Sheet: Ag
ENP Diameter (nm)/Zeta potential (mV)	-50	-40	-30	-20	-10	0			-50	-40	-30	-20	-10	0
1	100	100	100	100	100	100		1	C	C	C	C	C	C
2	100	100	100	100	100	100		2	C	C	C	C	C	C
3	100	100	100	100	100	100		3	C	C	C	C	C	C
4	100	100	100	100	100	100		4	C	C	C	C	C	C
5	100	100	100	100	100	100		5	C	C	C	C	C	C
6	100	100	100	100	100	100		6	C	C	C	C	C	C
7	100	100	100	100	100	100		7	C	C	C	C	C	C
8	100	100	100	100	100	100		8	C	C	C	C	C	C
9	100	100	100	100	100	100		9	C	C	C	C	C	C
10	100	100	100	100	100	100		10	C	C	C	C	C	C
11	100	100	100	100	100	100		11	C	C	C	C	C	C
12	100	100	100	100	100	100		12	C	C	C	C	C	C
13	100	100	100	100	100	100		13	C	C	C	C	C	C
14	100	100	100	100	100	100		14	C	C	C	C	C	C
15	100	100	100	100	100	100		15	C	C	C	C	C	C
16	100	100	100	100	100	100		16	C	C	C	C	C	C
17	100	100	100	100	100	100		17	C	C	C	C	C	C
18	100	100	100	100	100	100		18	C	C	C	C	C	C
19	100	100	100	100	100	100		19	C	C	C	C	C	C
20	100	100	100	100	100	100		20	C	C	C	C	C	C
21	100	100	100	100	100	100		21	C	C	C	C	C	C
22	100	100	100	100	100	100		22	C	C	C	C	C	C
23	100	100	100	100	100	100		23	C	C	C	C	C	C
24	99	100	100	100	100	100		24	L	C	C	C	C	C
25	99	100	100	100	100	100		25	L	C	C	C	C	C
26	99	100	100	100	100	100		26	L	C	C	C	C	C
27	99	100	100	100	100	100		27	L	C	C	C	C	C
28	99	100	100	100	100	100		28	L	C	C	C	C	C
29	98	100	100	100	100	100		29	L	C	C	C	C	C
30	98	99	100	100	100	100		30	L	L	C	C	C	C
31	98	99	100	100	100	100		31	L	L	C	C	C	C
32	98	99	100	100	100	100		32	L	L	C	C	C	C
33	98	99	100	100	100	100		33	L	L	C	C	C	C
34	97	99	100	100	100	100		34	L	L	C	C	C	C
35	96	99	100	100	100	100		35	L	L	C	C	C	C
36	96	99	100	100	100	100		36	L	L	C	C	C	C
37	96	99	100	100	100	100		37	L	L	C	C	C	C
38	95	98	100	100	100	100		38	L	L	C	C	C	C
39	95	98	100	100	100	100		39	L	L	C	C	C	C
40	95	98	100	100	100	100		40	L	L	C	C	C	C
41	94	98	100	100	100	100		41	L	L	C	C	C	C
42	94	98	100	100	100	100		42	L	L	C	C	C	C
43	94	98	100	100	100	100		43	L	L	C	C	C	C
44	93	97	100	100	100	100		44	L	L	C	C	C	C
45	93	97	100	100	100	100		45	L	L	C	C	C	C
46	93	97	100	100	100	100		46	L	L	C	C	C	C
47	92	97	100	100	100	100		47	L	L	C	C	C	C
48	92	97	99	100	100	100		48	L	L	L	C	C	C
49	91	96	99	100	100	100		49	L	L	L	C	C	C
50	91	96	99	100	100	100		50	L	L	L	C	C	C
51	91	96	99	100	100	100		51	L	L	L	C	C	C
52	90	96	99	100	100	100		52	L	L	L	C	C	C
53	90	96	99	100	100	100		53	L	L	L	C	C	C
54	89	96	99	100	100	100		54	L	L	L	C	C	C
55	89	95	99	100	100	100		55	L	L	L	C	C	C
56	89	95	99	100	100	100		56	L	L	L	C	C	C
57	89	95	99	100	100	100		57	L	L	L	C	C	C
58	88	94	99	100	100	100		58	L	L	L	C	C	C
59	88	94	99	100	100	100		59	L	L	L	C	C	C
60	88	93	98	100	100	100		60	L	L	L	C	C	C
61	87	94	98	100	100	100		61	L	L	L	C	C	C
62	86	94	99	100	100	100		62	L	L	L	C	C	C
63	87	93	98	100	100	100		63	L	L	L	C	C	C
64	86	93	98	100	100	100		64	L	L	L	C	C	C
65	86	93	98	100	100	100		65	L	L	L	C	C	C
66	85	93	98	100	100	100		66	L	L	L	C	C	C
67	85	92	98	100	100	100		67	L	L	L	C	C	C
68	85	93	98	100	100	100		68	L	L	L	C	C	C
69	84	92	98	100	100	100		69	L	L	L	C	C	C
70	84	92	98	100	100	100		70	L	L	L	C	C	C
71	84	92	98	100	100	100		71	L	L	L	C	C	C
72	84	91	98	100	100	100		72	L	L	L	C	C	C
73	83	92	97	100	100	100		73	L	L	L	C	C	C
74	83	91	97	100	100	100		74	L	L	L	C	C	C
75	82	91	97	100	100	100		75	L	L	L	C	C	C
76	83	91	97	100	100	100		76	L	L	L	C	C	C
77	82	91	97	100	100	100		77	L	L	L	C	C	C
78	82	91	97	100	100	100		78	L	L	L	C	C	C
79	82	90	97	100	100	100		79	L	L	L	C	C	C
80	82	90	97	100	100	100		80	L	L	L	C	C	C
81	82	90	96	100	100	100		81	L	L	L	C	C	C
82	82	90	96	100	100	100		82	L	L	L	C	C	C
83	81	89	97	100	100	100		83	L	L	L	C	C	C
84	81	90	96	100	100	100		84	L	L	L	C	C	C
85	81	89	97	100	100	100		85	L	L	L	C	C	C
86	81	89	96	100	100	100		86	L	L	L	C	C	C
87	80	89	96	100	100	100		87	L	L	L	C	C	C
88	80	89	96	100	100	100		88	L	L	L	C	C	C
89	80	88	96	100	100	100		89	L	L	L	C	C	C
90	80	88	96	100	100	100		90	L	L	L	C	C	C
91	79	88	96	100	100	100		91	L	L	L	C	C	C
92	79	88	96	99	100	100		92	L	L	L	L	C	C
93	79	88	95	99	100	100		93	L	L	L	L	C	C
94	79	88	95	99	100	100		94	L	L	L	L	C	C
95	78	88	95	99	100	100		95	L	L	L	L	C	C
96	79	87	95	99	100	100		96	L	L	L	L	C	C
97	78	87	95	99	100	100		97	L	L	L	L	C	C
98	78	87	95	99	100	100		98	L	L	L	L	C	C
99	78	88	95	99	100	100		99	L	L	L	L	C	C
100	78	87	95	99	100	100		100	L	L	L	L	C	C
101	79	87	95	99	100	100		101	L	L	L	L	C	C
102	77	87	95	99	100	100		102	L	L	L	L	C	C
103	77	86	95	99	100	100		103	L	L	L	L	C	C
104	78	86	94	99	100	100		104	L	L	L	L	C	C
105	78	87	94	99	100	100		105	L	L	L	L	C	C
106	77	86	94	99	100	100		106	L	L	L	L	C	C
107	78	87	94	99	100	100		107	L	L	L	L	C	C
108	77	86	94	99	100	100		108	L	L	L	L	C	C
109	77	86	94	99	100	100		109	L	L	L	L	C	C
110	77	85	94	99	100	100		110	L	L	L	L	C	C
111	76	86	94	99	100	100		111	L	L	L	L	C	C
112	76	85	94	99	100	100		112	L	L	L	L	C	C
113	77	85	94	99	100	100		113	L	L	L	L	C	C
114	76	85	94	99	100	100		114	L	L	L	L	C	C
115	76	85	94	99	100	100		115	L	L	L	L	C	C
116	75	85	94	99	100	100		116	L	L	L	L	C	C
117	77	85	94	99	100	100		117	L	L	L	L	C	C
118	75	85	94	99	100	100		118	L	L	L	L	C	C
119	76	84	94	99	100	100		119	L	L	L	L	C	C
120	76	85	94	99	100	100		120	L	L	L	L	C	C
121	75	84	93	99	100	100		121	L	L	L	L	C	C
122	75	84	93	99	100	100		122	L	L	L	L	C	C
123	74	84	93	99	100	100		123	U	L	L	L	C	C
124	75	84	93	99	100	100		124	L	L	L	L	C	C
125	75	84	93	99	100	100		125	L	L	L	L	C	C
126	75	84	93	99	100	100		126	L	L	L	L	C	C
127	75	83	93	99	100	100		127	L	L	L	L	C	C
128	74	84	92	99	100	100		128	U	L	L	L	C	C
129	74	84	92	99	100	100		129	U	L	L	L	C	C
130	74	83	93	99	100	100		130	U	L	L	L	C	C
131	74	83	93	99	100	100		131	U	L	L	L	C	C
132	74	83	93	99	100	100		132	U	L	L	L	C	C
133	74	83	93	99	100	100		133	U	L	L	L	C	C
134	74	83	92	99	100	100		134	U	L	L	L	C	C
135	74	83	93	99	100	100		135	U	L	L	L	C	C
136	74	83	92	99	100	100		136	U	L	L	L	C	C
137	74	83	93	99	100	100		137	U	L	L	L	C	C
138	74	83	92	98	100	100		138	U	L	L	L	C	C
139	73	83	92	99	100	100		139	U	L	L	L	C	C
140	73	83	92	98	100	100		140	U	L	L	L	C	C
141	72	83	92	98	100	100		141	U	L	L	L	C	C
142	74	82	92	98	100	100		142	U	L	L	L	C	C
143	73	82	92	99	100	100		143	U	L	L	L	C	C
144	73	82	92	98	100	100		144	U	L	L	L	C	C
145	73	83	91	98	100	100		145	U	L	L	L	C	C
146	72	82	92	98	100	100		146	U	L	L	L	C	C
147	72	83	92	98	100	100		147	U	L	L	L	C	C
148	72	82	92	98	100	100		148	U	L	L	L	C	C
149	73	82	92	98	100	100		149	U	L	L	L	C	C
150	72	82	92	98	100	100		150	U	L	L	L	C	C
151	72	81	92	98	100	100		151	U	L	L	L	C	C
152	73	82	92	98	100	100		152	U	L	L	L	C	C
153	73	82	92	98	100	100		153	U	L	L	L	C	C
154	72	82	91	98	100	100		154	U	L	L	L	C	C
155	72	81	91	98	100	100		155	U	L	L	L	C	C
156	72	82	91	98	100	100		156	U	L	L	L	C	C
157	72	81	92	98	100	100		157	U	L	L	L	C	C
158	72	82	91	98	100	100		158	U	L	L	L	C	C
159	72	81	91	98	100	100		159	U	L	L	L	C	C
160	72	82	91	98	100	100		160	U	L	L	L	C	C
161	71	82	91	98	100	100		161	U	L	L	L	C	C
162	72	81	91	98	100	100		162	U	L	L	L	C	C
163	71	81	91	98	100	100		163	U	L	L	L	C	C
164	71	81	91	98	100	100		164	U	L	L	L	C	C
165	71	81	91	98	100	100		165	U	L	L	L	C	C
166	71	81	90	98	100	100		166	U	L	L	L	C	C
167	71	80	91	98	100	100		167	U	L	L	L	C	C
168	71	81	90	98	100	100		168	U	L	L	L	C	C
169	71	81	91	98	100	100		169	U	L	L	L	C	C
170	71	81	91	98	100	100		170	U	L	L	L	C	C
171	71	81	90	98	100	100		171	U	L	L	L	C	C
172	72	80	90	98	100	100		172	U	L	L	L	C	C
173	71	80	91	98	100	100		173	U	L	L	L	C	C
174	70	80	91	98	100	100		174	U	L	L	L	C	C
175	70	80	90	98	100	100		175	U	L	L	L	C	C
176	72	80	90	97	100	100		176	U	L	L	L	C	C
177	71	80	91	98	100	100		177	U	L	L	L	C	C
178	71	80	90	98	100	100		178	U	L	L	L	C	C
179	70	81	90	98	100	100		179	U	L	L	L	C	C
180	71	80	91	98	100	100		180	U	L	L	L	C	C
181	71	80	90	98	100	100		181	U	L	L	L	C	C
182	70	80	90	97	100	100		182	U	L	L	L	C	C
183	70	80	90	98	100	100		183	U	L	L	L	C	C
184	70	80	90	98	100	100		184	U	L	L	L	C	C
185	71	79	90	98	100	100		185	U	L	L	L	C	C
186	70	79	90	98	100	100		186	U	L	L	L	C	C
187	69	81	90	97	100	100		187	U	L	L	L	C	C
188	70	80	90	97	100	100		188	U	L	L	L	C	C
189	70	79	90	98	100	100		189	U	L	L	L	C	C
190	68	79	90	98	100	100		190	U	L	L	L	C	C
191	69	80	89	98	100	100		191	U	L	L	L	C	C
192	70	79	90	98	100	100		192	U	L	L	L	C	C
193	71	80	89	97	100	100		193	U	L	L	L	C	C
194	70	79	90	98	100	100		194	U	L	L	L	C	C
195	70	79	89	97	100	100		195	U	L	L	L	C	C
196	69	79	90	98	100	100		196	U	L	L	L	C	C
197	69	80	89	97	100	100		197	U	L	L	L	C	C
198	69	79	89	97	100	100		198	U	L	L	L	C	C
199	70	79	89	97	100	100		199	U	L	L	L	C	C
200	69	79	90	97	100	100		200	U	L	L	L	C	C

## Sheet: Al
ENP Diameter (nm)/Zeta potential (mV)	-50	-40	-30	-20	-10	0			-50	-40	-30	-20	-10	0
1	100	100	100	100	100	100		1	C	C	C	C	C	C
2	100	100	100	100	100	100		2	C	C	C	C	C	C
3	100	100	100	100	100	100		3	C	C	C	C	C	C
4	100	100	100	100	100	100		4	C	C	C	C	C	C
5	100	100	100	100	100	100		5	C	C	C	C	C	C
6	100	100	100	100	100	100		6	C	C	C	C	C	C
7	100	100	100	100	100	100		7	C	C	C	C	C	C
8	100	100	100	100	100	100		8	C	C	C	C	C	C
9	100	100	100	100	100	100		9	C	C	C	C	C	C
10	100	100	100	100	100	100		10	C	C	C	C	C	C
11	100	100	100	100	100	100		11	C	C	C	C	C	C
12	100	100	100	100	100	100		12	C	C	C	C	C	C
13	100	100	100	100	100	100		13	C	C	C	C	C	C
14	100	100	100	100	100	100		14	C	C	C	C	C	C
15	100	100	100	100	100	100		15	C	C	C	C	C	C
16	100	100	100	100	100	100		16	C	C	C	C	C	C
17	100	100	100	100	100	100		17	C	C	C	C	C	C
18	100	100	100	100	100	100		18	C	C	C	C	C	C
19	100	100	100	100	100	100		19	C	C	C	C	C	C
20	100	100	100	100	100	100		20	C	C	C	C	C	C
21	100	100	100	100	100	100		21	C	C	C	C	C	C
22	100	100	100	100	100	100		22	C	C	C	C	C	C
23	100	100	100	100	100	100		23	C	C	C	C	C	C
24	100	100	100	100	100	100		24	C	C	C	C	C	C
25	100	100	100	100	100	100		25	C	C	C	C	C	C
26	100	100	100	100	100	100		26	C	C	C	C	C	C
27	100	100	100	100	100	100		27	C	C	C	C	C	C
28	100	100	100	100	100	100		28	C	C	C	C	C	C
29	100	100	100	100	100	100		29	C	C	C	C	C	C
30	100	100	100	100	100	100		30	C	C	C	C	C	C
31	100	100	100	100	100	100		31	C	C	C	C	C	C
32	100	100	100	100	100	100		32	C	C	C	C	C	C
33	100	100	100	100	100	100		33	C	C	C	C	C	C
34	100	100	100	100	100	100		34	C	C	C	C	C	C
35	100	100	100	100	100	100		35	C	C	C	C	C	C
36	100	100	100	100	100	100		36	C	C	C	C	C	C
37	100	100	100	100	100	100		37	C	C	C	C	C	C
38	100	100	100	100	100	100		38	C	C	C	C	C	C
39	99	100	100	100	100	100		39	L	C	C	C	C	C
40	99	100	100	100	100	100		40	L	C	C	C	C	C
41	99	100	100	100	100	100		41	L	C	C	C	C	C
42	99	100	100	100	100	100		42	L	C	C	C	C	C
43	99	100	100	100	100	100		43	L	C	C	C	C	C
44	99	100	100	100	100	100		44	L	C	C	C	C	C
45	98	100	100	100	100	100		45	L	C	C	C	C	C
46	98	100	100	100	100	100		46	L	C	C	C	C	C
47	98	100	100	100	100	100		47	L	C	C	C	C	C
48	98	100	100	100	100	100		48	L	C	C	C	C	C
49	98	100	100	100	100	100		49	L	C	C	C	C	C
50	97	99	100	100	100	100		50	L	L	C	C	C	C
51	97	99	100	100	100	100		51	L	L	C	C	C	C
52	97	99	100	100	100	100		52	L	L	C	C	C	C
53	97	99	100	100	100	100		53	L	L	C	C	C	C
54	97	99	100	100	100	100		54	L	L	C	C	C	C
55	96	99	100	100	100	100		55	L	L	C	C	C	C
56	96	99	100	100	100	100		56	L	L	C	C	C	C
57	95	99	100	100	100	100		57	L	L	C	C	C	C
58	95	99	100	100	100	100		58	L	L	C	C	C	C
59	95	99	100	100	100	100		59	L	L	C	C	C	C
60	95	98	100	100	100	100		60	L	L	C	C	C	C
61	94	98	100	100	100	100		61	L	L	C	C	C	C
62	94	98	100	100	100	100		62	L	L	C	C	C	C
63	94	98	100	100	100	100		63	L	L	C	C	C	C
64	93	98	100	100	100	100		64	L	L	C	C	C	C
65	93	98	100	100	100	100		65	L	L	C	C	C	C
66	92	98	100	100	100	100		66	L	L	C	C	C	C
67	92	98	100	100	100	100		67	L	L	C	C	C	C
68	93	97	100	100	100	100		68	L	L	C	C	C	C
69	92	97	100	100	100	100		69	L	L	C	C	C	C
70	92	97	100	100	100	100		70	L	L	C	C	C	C
71	92	97	100	100	100	100		71	L	L	C	C	C	C
72	91	97	99	100	100	100		72	L	L	L	C	C	C
73	90	96	99	100	100	100		73	L	L	L	C	C	C
74	91	96	100	100	100	100		74	L	L	C	C	C	C
75	90	96	100	100	100	100		75	L	L	C	C	C	C
76	90	96	99	100	100	100		76	L	L	L	C	C	C
77	90	96	99	100	100	100		77	L	L	L	C	C	C
78	90	96	99	100	100	100		78	L	L	L	C	C	C
79	89	95	99	100	100	100		79	L	L	L	C	C	C
80	89	95	99	100	100	100		80	L	L	L	C	C	C
81	88	95	99	100	100	100		81	L	L	L	C	C	C
82	88	95	99	100	100	100		82	L	L	L	C	C	C
83	88	95	99	100	100	100		83	L	L	L	C	C	C
84	87	95	99	100	100	100		84	L	L	L	C	C	C
85	88	95	99	100	100	100		85	L	L	L	C	C	C
86	87	94	99	100	100	100		86	L	L	L	C	C	C
87	87	95	99	100	100	100		87	L	L	L	C	C	C
88	87	94	99	100	100	100		88	L	L	L	C	C	C
89	87	94	99	100	100	100		89	L	L	L	C	C	C
90	86	94	99	100	100	100		90	L	L	L	C	C	C
91	87	94	98	100	100	100		91	L	L	L	C	C	C
92	86	93	99	100	100	100		92	L	L	L	C	C	C
93	86	93	98	100	100	100		93	L	L	L	C	C	C
94	86	93	98	100	100	100		94	L	L	L	C	C	C
95	85	93	98	100	100	100		95	L	L	L	C	C	C
96	85	93	98	100	100	100		96	L	L	L	C	C	C
97	85	92	98	100	100	100		97	L	L	L	C	C	C
98	85	93	98	100	100	100		98	L	L	L	C	C	C
99	85	92	98	100	100	100		99	L	L	L	C	C	C
100	85	92	98	100	100	100		100	L	L	L	C	C	C
101	85	92	98	100	100	100		101	L	L	L	C	C	C
102	84	92	98	100	100	100		102	L	L	L	C	C	C
103	83	92	98	100	100	100		103	L	L	L	C	C	C
104	83	92	98	100	100	100		104	L	L	L	C	C	C
105	83	92	98	100	100	100		105	L	L	L	C	C	C
106	83	92	97	100	100	100		106	L	L	L	C	C	C
107	83	91	97	100	100	100		107	L	L	L	C	C	C
108	83	92	98	100	100	100		108	L	L	L	C	C	C
109	83	91	97	100	100	100		109	L	L	L	C	C	C
110	83	91	97	100	100	100		110	L	L	L	C	C	C
111	82	91	97	100	100	100		111	L	L	L	C	C	C
112	82	90	97	100	100	100		112	L	L	L	C	C	C
113	82	91	97	100	100	100		113	L	L	L	C	C	C
114	82	90	97	100	100	100		114	L	L	L	C	C	C
115	82	90	97	100	100	100		115	L	L	L	C	C	C
116	81	90	97	100	100	100		116	L	L	L	C	C	C
117	81	90	97	100	100	100		117	L	L	L	C	C	C
118	82	90	97	100	100	100		118	L	L	L	C	C	C
119	82	90	97	100	100	100		119	L	L	L	C	C	C
120	81	89	97	100	100	100		120	L	L	L	C	C	C
121	82	89	96	100	100	100		121	L	L	L	C	C	C
122	81	90	97	100	100	100		122	L	L	L	C	C	C
123	81	90	97	100	100	100		123	L	L	L	C	C	C
124	80	89	96	100	100	100		124	L	L	L	C	C	C
125	80	89	96	100	100	100		125	L	L	L	C	C	C
126	80	89	96	100	100	100		126	L	L	L	C	C	C
127	80	89	96	100	100	100		127	L	L	L	C	C	C
128	80	88	97	100	100	100		128	L	L	L	C	C	C
129	80	89	96	100	100	100		129	L	L	L	C	C	C
130	81	89	96	100	100	100		130	L	L	L	C	C	C
131	80	89	96	100	100	100		131	L	L	L	C	C	C
132	80	89	96	100	100	100		132	L	L	L	C	C	C
133	79	88	96	100	100	100		133	L	L	L	C	C	C
134	80	88	96	100	100	100		134	L	L	L	C	C	C
135	79	88	96	100	100	100		135	L	L	L	C	C	C
136	80	88	96	100	100	100		136	L	L	L	C	C	C
137	79	89	96	99	100	100		137	L	L	L	L	C	C
138	79	88	96	100	100	100		138	L	L	L	C	C	C
139	79	88	95	99	100	100		139	L	L	L	L	C	C
140	79	88	96	99	100	100		140	L	L	L	L	C	C
141	78	88	95	99	100	100		141	L	L	L	L	C	C
142	78	87	95	100	100	100		142	L	L	L	C	C	C
143	78	88	96	100	100	100		143	L	L	L	C	C	C
144	78	87	95	99	100	100		144	L	L	L	L	C	C
145	78	88	95	99	100	100		145	L	L	L	L	C	C
146	78	87	95	99	100	100		146	L	L	L	L	C	C
147	78	87	95	99	100	100		147	L	L	L	L	C	C
148	78	87	95	99	100	100		148	L	L	L	L	C	C
149	78	86	95	99	100	100		149	L	L	L	L	C	C
150	77	86	95	99	100	100		150	L	L	L	L	C	C
151	77	86	95	99	100	100		151	L	L	L	L	C	C
152	78	86	95	99	100	100		152	L	L	L	L	C	C
153	77	87	95	99	100	100		153	L	L	L	L	C	C
154	76	87	95	99	100	100		154	L	L	L	L	C	C
155	77	86	95	99	100	100		155	L	L	L	L	C	C
156	78	86	95	99	100	100		156	L	L	L	L	C	C
157	77	87	95	99	100	100		157	L	L	L	L	C	C
158	77	86	95	99	100	100		158	L	L	L	L	C	C
159	77	86	95	99	100	100		159	L	L	L	L	C	C
160	76	86	94	99	100	100		160	L	L	L	L	C	C
161	76	86	95	99	100	100		161	L	L	L	L	C	C
162	77	85	94	99	100	100		162	L	L	L	L	C	C
163	77	86	95	99	100	100		163	L	L	L	L	C	C
164	77	86	94	99	100	100		164	L	L	L	L	C	C
165	76	86	94	99	100	100		165	L	L	L	L	C	C
166	76	86	94	99	100	100		166	L	L	L	L	C	C
167	76	84	94	99	100	100		167	L	L	L	L	C	C
168	76	85	94	99	100	100		168	L	L	L	L	C	C
169	76	86	94	99	100	100		169	L	L	L	L	C	C
170	75	85	94	99	100	100		170	L	L	L	L	C	C
171	76	85	94	99	100	100		171	L	L	L	L	C	C
172	75	85	94	99	100	100		172	L	L	L	L	C	C
173	75	85	94	99	100	100		173	L	L	L	L	C	C
174	76	85	94	99	100	100		174	L	L	L	L	C	C
175	76	85	94	99	100	100		175	L	L	L	L	C	C
176	75	85	94	99	100	100		176	L	L	L	L	C	C
177	75	85	93	99	100	100		177	L	L	L	L	C	C
178	74	85	93	99	100	100		178	U	L	L	L	C	C
179	76	85	94	99	100	100		179	L	L	L	L	C	C
180	75	84	93	99	100	100		180	L	L	L	L	C	C
181	75	84	93	99	100	100		181	L	L	L	L	C	C
182	76	84	93	99	100	100		182	L	L	L	L	C	C
183	75	85	93	99	100	100		183	L	L	L	L	C	C
184	74	84	94	99	100	100		184	U	L	L	L	C	C
185	74	84	93	99	100	100		185	U	L	L	L	C	C
186	74	85	93	99	100	100		186	U	L	L	L	C	C
187	75	84	93	99	100	100		187	L	L	L	L	C	C
188	74	83	93	99	100	100		188	U	L	L	L	C	C
189	74	85	93	99	100	100		189	U	L	L	L	C	C
190	76	84	92	99	100	100		190	L	L	L	L	C	C
191	74	84	93	99	100	100		191	U	L	L	L	C	C
192	74	85	93	99	100	100		192	U	L	L	L	C	C
193	75	84	93	99	100	100		193	L	L	L	L	C	C
194	75	84	93	99	100	100		194	L	L	L	L	C	C
195	74	84	93	99	100	100		195	U	L	L	L	C	C
196	75	84	93	99	100	100		196	L	L	L	L	C	C
197	75	83	93	99	100	100		197	L	L	L	L	C	C
198	74	83	92	99	100	100		198	U	L	L	L	C	C
199	74	84	93	99	100	100		199	U	L	L	L	C	C
200	73	83	92	98	100	100		200	U	L	L	L	C	C

## Sheet: Al2O3
ENP Diameter (nm)/Zeta potential (mV)	-50	-40	-30	-20	-10	0			-50	-40	-30	-20	-10	0
1	100	100	100	100	100	100		1	C	C	C	C	C	C
2	100	100	100	100	100	100		2	C	C	C	C	C	C
3	100	100	100	100	100	100		3	C	C	C	C	C	C
4	100	100	100	100	100	100		4	C	C	C	C	C	C
5	100	100	100	100	100	100		5	C	C	C	C	C	C
6	100	100	100	100	100	100		6	C	C	C	C	C	C
7	100	100	100	100	100	100		7	C	C	C	C	C	C
8	100	100	100	100	100	100		8	C	C	C	C	C	C
9	100	100	100	100	100	100		9	C	C	C	C	C	C
10	100	100	100	100	100	100		10	C	C	C	C	C	C
11	100	100	100	100	100	100		11	C	C	C	C	C	C
12	100	100	100	100	100	100		12	C	C	C	C	C	C
13	100	100	100	100	100	100		13	C	C	C	C	C	C
14	100	100	100	100	100	100		14	C	C	C	C	C	C
15	100	100	100	100	100	100		15	C	C	C	C	C	C
16	100	100	100	100	100	100		16	C	C	C	C	C	C
17	100	100	100	100	100	100		17	C	C	C	C	C	C
18	100	100	100	100	100	100		18	C	C	C	C	C	C
19	100	100	100	100	100	100		19	C	C	C	C	C	C
20	100	100	100	100	100	100		20	C	C	C	C	C	C
21	100	100	100	100	100	100		21	C	C	C	C	C	C
22	100	100	100	100	100	100		22	C	C	C	C	C	C
23	100	100	100	100	100	100		23	C	C	C	C	C	C
24	100	100	100	100	100	100		24	C	C	C	C	C	C
25	100	100	100	100	100	100		25	C	C	C	C	C	C
26	100	100	100	100	100	100		26	C	C	C	C	C	C
27	100	100	100	100	100	100		27	C	C	C	C	C	C
28	100	100	100	100	100	100		28	C	C	C	C	C	C
29	100	100	100	100	100	100		29	C	C	C	C	C	C
30	100	100	100	100	100	100		30	C	C	C	C	C	C
31	99	100	100	100	100	100		31	L	C	C	C	C	C
32	99	100	100	100	100	100		32	L	C	C	C	C	C
33	99	100	100	100	100	100		33	L	C	C	C	C	C
34	98	100	100	100	100	100		34	L	C	C	C	C	C
35	98	100	100	100	100	100		35	L	C	C	C	C	C
36	98	100	100	100	100	100		36	L	C	C	C	C	C
37	98	100	100	100	100	100		37	L	C	C	C	C	C
38	97	100	100	100	100	100		38	L	C	C	C	C	C
39	97	100	100	100	100	100		39	L	C	C	C	C	C
40	96	99	100	100	100	100		40	L	L	C	C	C	C
41	96	99	100	100	100	100		41	L	L	C	C	C	C
42	95	99	100	100	100	100		42	L	L	C	C	C	C
43	94	99	100	100	100	100		43	L	L	C	C	C	C
44	94	98	100	100	100	100		44	L	L	C	C	C	C
45	93	98	100	100	100	100		45	L	L	C	C	C	C
46	93	98	100	100	100	100		46	L	L	C	C	C	C
47	92	98	100	100	100	100		47	L	L	C	C	C	C
48	92	98	100	100	100	100		48	L	L	C	C	C	C
49	91	97	100	100	100	100		49	L	L	C	C	C	C
50	89	97	100	100	100	100		50	L	L	C	C	C	C
51	89	97	100	100	100	100		51	L	L	C	C	C	C
52	89	97	100	100	100	100		52	L	L	C	C	C	C
53	88	96	100	100	100	100		53	L	L	C	C	C	C
54	87	96	100	100	100	100		54	L	L	C	C	C	C
55	86	95	100	100	100	100		55	L	L	C	C	C	C
56	86	95	99	100	100	100		56	L	L	L	C	C	C
57	86	94	99	100	100	100		57	L	L	L	C	C	C
58	85	94	99	100	100	100		58	L	L	L	C	C	C
59	85	94	99	100	100	100		59	L	L	L	C	C	C
60	83	94	99	100	100	100		60	L	L	L	C	C	C
61	83	93	99	100	100	100		61	L	L	L	C	C	C
62	82	93	99	100	100	100		62	L	L	L	C	C	C
63	83	93	99	100	100	100		63	L	L	L	C	C	C
64	82	92	99	100	100	100		64	L	L	L	C	C	C
65	81	92	99	100	100	100		65	L	L	L	C	C	C
66	80	91	98	100	100	100		66	L	L	L	C	C	C
67	79	91	98	100	100	100		67	L	L	L	C	C	C
68	79	91	98	100	100	100		68	L	L	L	C	C	C
69	78	90	98	100	100	100		69	L	L	L	C	C	C
70	78	89	98	100	100	100		70	L	L	L	C	C	C
71	79	90	98	100	100	100		71	L	L	L	C	C	C
72	78	89	98	100	100	100		72	L	L	L	C	C	C
73	76	88	98	100	100	100		73	L	L	L	C	C	C
74	76	89	97	100	100	100		74	L	L	L	C	C	C
75	76	88	97	100	100	100		75	L	L	L	C	C	C
76	76	88	97	100	100	100		76	L	L	L	C	C	C
77	75	87	97	100	100	100		77	L	L	L	C	C	C
78	75	87	97	100	100	100		78	L	L	L	C	C	C
79	75	87	96	100	100	100		79	L	L	L	C	C	C
80	74	86	96	100	100	100		80	U	L	L	C	C	C
81	74	86	96	100	100	100		81	U	L	L	C	C	C
82	73	86	96	100	100	100		82	U	L	L	C	C	C
83	74	85	96	100	100	100		83	U	L	L	C	C	C
84	72	85	96	100	100	100		84	U	L	L	C	C	C
85	72	85	96	100	100	100		85	U	L	L	C	C	C
86	72	85	95	100	100	100		86	U	L	L	C	C	C
87	71	84	96	100	100	100		87	U	L	L	C	C	C
88	71	85	95	100	100	100		88	U	L	L	C	C	C
89	71	84	95	100	100	100		89	U	L	L	C	C	C
90	69	85	95	100	100	100		90	U	L	L	C	C	C
91	70	83	95	100	100	100		91	U	L	L	C	C	C
92	69	82	94	100	100	100		92	U	L	L	C	C	C
93	69	83	94	100	100	100		93	U	L	L	C	C	C
94	69	82	94	100	100	100		94	U	L	L	C	C	C
95	69	81	94	100	100	100		95	U	L	L	C	C	C
96	68	81	93	100	100	100		96	U	L	L	C	C	C
97	69	81	94	100	100	100		97	U	L	L	C	C	C
98	68	81	93	100	100	100		98	U	L	L	C	C	C
99	68	80	93	100	100	100		99	U	L	L	C	C	C
100	68	80	93	99	100	100		100	U	L	L	L	C	C
101	67	80	93	99	100	100		101	U	L	L	L	C	C
102	67	80	93	99	100	100		102	U	L	L	L	C	C
103	67	80	93	99	100	100		103	U	L	L	L	C	C
104	67	79	92	99	100	100		104	U	L	L	L	C	C
105	65	79	92	99	100	100		105	U	L	L	L	C	C
106	66	80	92	99	100	100		106	U	L	L	L	C	C
107	65	79	92	99	100	100		107	U	L	L	L	C	C
108	64	78	92	99	100	100		108	U	L	L	L	C	C
109	65	78	92	99	100	100		109	U	L	L	L	C	C
110	64	78	91	99	100	100		110	U	L	L	L	C	C
111	64	78	92	99	100	100		111	U	L	L	L	C	C
112	64	78	91	99	100	100		112	U	L	L	L	C	C
113	65	79	91	99	100	100		113	U	L	L	L	C	C
114	64	77	91	99	100	100		114	U	L	L	L	C	C
115	65	78	91	99	100	100		115	U	L	L	L	C	C
116	64	77	90	99	100	100		116	U	L	L	L	C	C
117	63	77	90	99	100	100		117	U	L	L	L	C	C
118	63	77	90	99	100	100		118	U	L	L	L	C	C
119	63	76	90	99	100	100		119	U	L	L	L	C	C
120	63	77	91	99	100	100		120	U	L	L	L	C	C
121	62	76	90	99	100	100		121	U	L	L	L	C	C
122	63	76	90	99	100	100		122	U	L	L	L	C	C
123	63	76	90	99	100	100		123	U	L	L	L	C	C
124	62	75	90	99	100	100		124	U	L	L	L	C	C
125	62	75	89	99	100	100		125	U	L	L	L	C	C
126	62	76	89	98	100	100		126	U	L	L	L	C	C
127	62	75	89	98	100	100		127	U	L	L	L	C	C
128	62	74	89	98	100	100		128	U	U	L	L	C	C
129	61	75	89	98	100	100		129	U	L	L	L	C	C
130	62	75	89	99	100	100		130	U	L	L	L	C	C
131	62	74	89	98	100	100		131	U	U	L	L	C	C
132	61	75	88	98	100	100		132	U	L	L	L	C	C
133	61	74	89	98	100	100		133	U	U	L	L	C	C
134	60	74	88	98	100	100		134	U	U	L	L	C	C
135	60	73	89	98	100	100		135	U	U	L	L	C	C
136	60	74	88	98	100	100		136	U	U	L	L	C	C
137	60	74	88	98	100	100		137	U	U	L	L	C	C
138	60	73	88	98	100	100		138	U	U	L	L	C	C
139	60	73	88	98	100	100		139	U	U	L	L	C	C
140	59	74	88	98	100	100		140	U	U	L	L	C	C
141	59	73	88	98	100	100		141	U	U	L	L	C	C
142	60	73	88	98	100	100		142	U	U	L	L	C	C
143	59	72	87	98	100	100		143	U	U	L	L	C	C
144	59	73	87	98	100	100		144	U	U	L	L	C	C
145	60	73	87	97	100	100		145	U	U	L	L	C	C
146	59	72	87	98	100	100		146	U	U	L	L	C	C
147	59	72	87	98	100	100		147	U	U	L	L	C	C
148	59	72	87	98	100	100		148	U	U	L	L	C	C
149	58	72	86	98	100	100		149	U	U	L	L	C	C
150	58	73	86	98	100	100		150	U	U	L	L	C	C
151	59	72	87	97	100	100		151	U	U	L	L	C	C
152	58	72	86	97	100	100		152	U	U	L	L	C	C
153	58	72	86	98	100	100		153	U	U	L	L	C	C
154	58	72	86	97	100	100		154	U	U	L	L	C	C
155	58	71	86	97	100	100		155	U	U	L	L	C	C
156	57	71	86	97	100	100		156	U	U	L	L	C	C
157	58	71	87	97	100	100		157	U	U	L	L	C	C
158	57	71	85	97	100	100		158	U	U	L	L	C	C
159	57	72	85	97	100	100		159	U	U	L	L	C	C
160	58	71	86	97	100	100		160	U	U	L	L	C	C
161	58	71	86	97	100	100		161	U	U	L	L	C	C
162	56	70	86	97	100	100		162	U	U	L	L	C	C
163	58	71	85	97	100	100		163	U	U	L	L	C	C
164	56	71	86	97	100	100		164	U	U	L	L	C	C
165	57	70	85	97	100	100		165	U	U	L	L	C	C
166	57	70	85	97	100	100		166	U	U	L	L	C	C
167	57	71	85	97	100	100		167	U	U	L	L	C	C
168	57	70	85	97	100	100		168	U	U	L	L	C	C
169	56	71	85	97	100	100		169	U	U	L	L	C	C
170	55	70	84	96	100	100		170	U	U	L	L	C	C
171	56	69	84	97	100	100		171	U	U	L	L	C	C
172	56	69	85	97	100	100		172	U	U	L	L	C	C
173	56	69	85	97	100	100		173	U	U	L	L	C	C
174	56	69	85	97	100	100		174	U	U	L	L	C	C
175	56	69	85	97	100	100		175	U	U	L	L	C	C
176	55	69	84	96	100	100		176	U	U	L	L	C	C
177	56	69	84	96	100	100		177	U	U	L	L	C	C
178	56	69	84	96	100	100		178	U	U	L	L	C	C
179	55	69	84	96	100	100		179	U	U	L	L	C	C
180	56	69	84	96	100	100		180	U	U	L	L	C	C
181	56	68	84	96	100	100		181	U	U	L	L	C	C
182	56	68	84	96	100	100		182	U	U	L	L	C	C
183	55	69	84	96	100	100		183	U	U	L	L	C	C
184	55	69	84	96	100	100		184	U	U	L	L	C	C
185	56	68	84	96	100	100		185	U	U	L	L	C	C
186	55	69	84	96	100	100		186	U	U	L	L	C	C
187	55	68	83	96	100	100		187	U	U	L	L	C	C
188	56	68	84	96	100	100		188	U	U	L	L	C	C
189	55	68	84	96	100	100		189	U	U	L	L	C	C
190	55	68	84	96	100	100		190	U	U	L	L	C	C
191	55	68	84	96	100	100		191	U	U	L	L	C	C
192	54	67	83	96	100	100		192	U	U	L	L	C	C
193	54	67	83	96	100	100		193	U	U	L	L	C	C
194	54	67	84	96	100	100		194	U	U	L	L	C	C
195	54	67	83	96	100	100		195	U	U	L	L	C	C
196	54	67	83	96	100	100		196	U	U	L	L	C	C
197	54	67	83	96	100	100		197	U	U	L	L	C	C
198	55	67	83	95	100	100		198	U	U	L	L	C	C
199	54	68	83	96	100	100		199	U	U	L	L	C	C
200	54	68	83	95	100	100		200	U	U	L	L	C	C

## Sheet: Au
ENP Diameter (nm)/Zeta potential (mV)	-50	-40	-30	-20	-10	0			-50	-40	-30	-20	-10	0
1	100	100	100	100	100	100		1	C	C	C	C	C	C
2	100	100	100	100	100	100		2	C	C	C	C	C	C
3	100	100	100	100	100	100		3	C	C	C	C	C	C
4	100	100	100	100	100	100		4	C	C	C	C	C	C
5	100	100	100	100	100	100		5	C	C	C	C	C	C
6	100	100	100	100	100	100		6	C	C	C	C	C	C
7	100	100	100	100	100	100		7	C	C	C	C	C	C
8	100	100	100	100	100	100		8	C	C	C	C	C	C
9	100	100	100	100	100	100		9	C	C	C	C	C	C
10	100	100	100	100	100	100		10	C	C	C	C	C	C
11	100	100	100	100	100	100		11	C	C	C	C	C	C
12	100	100	100	100	100	100		12	C	C	C	C	C	C
13	100	100	100	100	100	100		13	C	C	C	C	C	C
14	100	100	100	100	100	100		14	C	C	C	C	C	C
15	100	100	100	100	100	100		15	C	C	C	C	C	C
16	100	100	100	100	100	100		16	C	C	C	C	C	C
17	100	100	100	100	100	100		17	C	C	C	C	C	C
18	100	100	100	100	100	100		18	C	C	C	C	C	C
19	100	100	100	100	100	100		19	C	C	C	C	C	C
20	100	100	100	100	100	100		20	C	C	C	C	C	C
21	100	100	100	100	100	100		21	C	C	C	C	C	C
22	100	100	100	100	100	100		22	C	C	C	C	C	C
23	100	100	100	100	100	100		23	C	C	C	C	C	C
24	100	100	100	100	100	100		24	C	C	C	C	C	C
25	100	100	100	100	100	100		25	C	C	C	C	C	C
26	100	100	100	100	100	100		26	C	C	C	C	C	C
27	100	100	100	100	100	100		27	C	C	C	C	C	C
28	100	100	100	100	100	100		28	C	C	C	C	C	C
29	100	100	100	100	100	100		29	C	C	C	C	C	C
30	100	100	100	100	100	100		30	C	C	C	C	C	C
31	100	100	100	100	100	100		31	C	C	C	C	C	C
32	100	100	100	100	100	100		32	C	C	C	C	C	C
33	100	100	100	100	100	100		33	C	C	C	C	C	C
34	100	100	100	100	100	100		34	C	C	C	C	C	C
35	100	100	100	100	100	100		35	C	C	C	C	C	C
36	100	100	100	100	100	100		36	C	C	C	C	C	C
37	100	100	100	100	100	100		37	C	C	C	C	C	C
38	100	100	100	100	100	100		38	C	C	C	C	C	C
39	100	100	100	100	100	100		39	C	C	C	C	C	C
40	100	100	100	100	100	100		40	C	C	C	C	C	C
41	99	100	100	100	100	100		41	L	C	C	C	C	C
42	99	100	100	100	100	100		42	L	C	C	C	C	C
43	99	100	100	100	100	100		43	L	C	C	C	C	C
44	99	100	100	100	100	100		44	L	C	C	C	C	C
45	99	100	100	100	100	100		45	L	C	C	C	C	C
46	99	100	100	100	100	100		46	L	C	C	C	C	C
47	99	100	100	100	100	100		47	L	C	C	C	C	C
48	98	100	100	100	100	100		48	L	C	C	C	C	C
49	98	100	100	100	100	100		49	L	C	C	C	C	C
50	98	100	100	100	100	100		50	L	C	C	C	C	C
51	98	100	100	100	100	100		51	L	C	C	C	C	C
52	98	100	100	100	100	100		52	L	C	C	C	C	C
53	98	99	100	100	100	100		53	L	L	C	C	C	C
54	98	100	100	100	100	100		54	L	C	C	C	C	C
55	97	99	100	100	100	100		55	L	L	C	C	C	C
56	97	99	100	100	100	100		56	L	L	C	C	C	C
57	97	99	100	100	100	100		57	L	L	C	C	C	C
58	97	99	100	100	100	100		58	L	L	C	C	C	C
59	97	99	100	100	100	100		59	L	L	C	C	C	C
60	96	99	100	100	100	100		60	L	L	C	C	C	C
61	96	99	100	100	100	100		61	L	L	C	C	C	C
62	96	99	100	100	100	100		62	L	L	C	C	C	C
63	95	99	100	100	100	100		63	L	L	C	C	C	C
64	96	99	100	100	100	100		64	L	L	C	C	C	C
65	95	98	100	100	100	100		65	L	L	C	C	C	C
66	95	98	100	100	100	100		66	L	L	C	C	C	C
67	95	98	100	100	100	100		67	L	L	C	C	C	C
68	95	98	100	100	100	100		68	L	L	C	C	C	C
69	95	98	100	100	100	100		69	L	L	C	C	C	C
70	94	98	100	100	100	100		70	L	L	C	C	C	C
71	94	98	100	100	100	100		71	L	L	C	C	C	C
72	94	98	100	100	100	100		72	L	L	C	C	C	C
73	94	98	100	100	100	100		73	L	L	C	C	C	C
74	93	98	100	100	100	100		74	L	L	C	C	C	C
75	94	97	100	100	100	100		75	L	L	C	C	C	C
76	93	97	100	100	100	100		76	L	L	C	C	C	C
77	93	97	100	100	100	100		77	L	L	C	C	C	C
78	93	97	100	100	100	100		78	L	L	C	C	C	C
79	92	97	99	100	100	100		79	L	L	L	C	C	C
80	93	97	99	100	100	100		80	L	L	L	C	C	C
81	92	97	99	100	100	100		81	L	L	L	C	C	C
82	92	97	99	100	100	100		82	L	L	L	C	C	C
83	92	96	99	100	100	100		83	L	L	L	C	C	C
84	91	96	99	100	100	100		84	L	L	L	C	C	C
85	91	96	99	100	100	100		85	L	L	L	C	C	C
86	91	96	99	100	100	100		86	L	L	L	C	C	C
87	92	96	99	100	100	100		87	L	L	L	C	C	C
88	91	96	99	100	100	100		88	L	L	L	C	C	C
89	92	96	99	100	100	100		89	L	L	L	C	C	C
90	90	96	99	100	100	100		90	L	L	L	C	C	C
91	90	96	99	100	100	100		91	L	L	L	C	C	C
92	91	96	99	100	100	100		92	L	L	L	C	C	C
93	90	96	99	100	100	100		93	L	L	L	C	C	C
94	90	96	99	100	100	100		94	L	L	L	C	C	C
95	90	96	99	100	100	100		95	L	L	L	C	C	C
96	90	95	99	100	100	100		96	L	L	L	C	C	C
97	89	95	99	100	100	100		97	L	L	L	C	C	C
98	89	95	99	100	100	100		98	L	L	L	C	C	C
99	90	95	99	100	100	100		99	L	L	L	C	C	C
100	89	95	99	100	100	100		100	L	L	L	C	C	C
101	89	95	99	100	100	100		101	L	L	L	C	C	C
102	89	95	99	100	100	100		102	L	L	L	C	C	C
103	88	95	99	100	100	100		103	L	L	L	C	C	C
104	89	95	99	100	100	100		104	L	L	L	C	C	C
105	88	94	99	100	100	100		105	L	L	L	C	C	C
106	89	94	99	100	100	100		106	L	L	L	C	C	C
107	88	94	98	100	100	100		107	L	L	L	C	C	C
108	88	94	98	100	100	100		108	L	L	L	C	C	C
109	87	94	98	100	100	100		109	L	L	L	C	C	C
110	87	94	98	100	100	100		110	L	L	L	C	C	C
111	88	94	98	100	100	100		111	L	L	L	C	C	C
112	88	94	98	100	100	100		112	L	L	L	C	C	C
113	87	93	98	100	100	100		113	L	L	L	C	C	C
114	87	94	98	100	100	100		114	L	L	L	C	C	C
115	87	94	98	100	100	100		115	L	L	L	C	C	C
116	87	93	98	100	100	100		116	L	L	L	C	C	C
117	87	94	98	100	100	100		117	L	L	L	C	C	C
118	86	93	98	100	100	100		118	L	L	L	C	C	C
119	86	93	98	100	100	100		119	L	L	L	C	C	C
120	86	92	98	100	100	100		120	L	L	L	C	C	C
121	86	93	98	100	100	100		121	L	L	L	C	C	C
122	86	93	98	100	100	100		122	L	L	L	C	C	C
123	86	93	98	100	100	100		123	L	L	L	C	C	C
124	86	92	98	100	100	100		124	L	L	L	C	C	C
125	86	93	97	100	100	100		125	L	L	L	C	C	C
126	86	92	97	100	100	100		126	L	L	L	C	C	C
127	85	93	97	100	100	100		127	L	L	L	C	C	C
128	86	93	98	100	100	100		128	L	L	L	C	C	C
129	85	92	97	100	100	100		129	L	L	L	C	C	C
130	86	92	97	100	100	100		130	L	L	L	C	C	C
131	85	92	97	100	100	100		131	L	L	L	C	C	C
132	85	91	97	100	100	100		132	L	L	L	C	C	C
133	85	92	98	100	100	100		133	L	L	L	C	C	C
134	85	92	97	100	100	100		134	L	L	L	C	C	C
135	85	91	97	100	100	100		135	L	L	L	C	C	C
136	85	92	97	100	100	100		136	L	L	L	C	C	C
137	85	92	97	100	100	100		137	L	L	L	C	C	C
138	85	92	97	100	100	100		138	L	L	L	C	C	C
139	84	91	97	100	100	100		139	L	L	L	C	C	C
140	84	91	97	100	100	100		140	L	L	L	C	C	C
141	84	91	97	100	100	100		141	L	L	L	C	C	C
142	84	91	97	100	100	100		142	L	L	L	C	C	C
143	84	91	97	100	100	100		143	L	L	L	C	C	C
144	84	91	97	100	100	100		144	L	L	L	C	C	C
145	84	91	97	100	100	100		145	L	L	L	C	C	C
146	84	92	97	100	100	100		146	L	L	L	C	C	C
147	84	91	97	100	100	100		147	L	L	L	C	C	C
148	83	91	97	100	100	100		148	L	L	L	C	C	C
149	84	91	97	100	100	100		149	L	L	L	C	C	C
150	83	91	96	100	100	100		150	L	L	L	C	C	C
151	83	91	97	100	100	100		151	L	L	L	C	C	C
152	83	91	97	100	100	100		152	L	L	L	C	C	C
153	84	90	96	100	100	100		153	L	L	L	C	C	C
154	83	91	97	100	100	100		154	L	L	L	C	C	C
155	83	91	97	100	100	100		155	L	L	L	C	C	C
156	84	90	96	99	100	100		156	L	L	L	L	C	C
157	83	91	97	100	100	100		157	L	L	L	C	C	C
158	83	90	96	100	100	100		158	L	L	L	C	C	C
159	83	90	96	100	100	100		159	L	L	L	C	C	C
160	83	90	96	100	100	100		160	L	L	L	C	C	C
161	83	90	96	100	100	100		161	L	L	L	C	C	C
162	82	90	96	100	100	100		162	L	L	L	C	C	C
163	82	90	96	100	100	100		163	L	L	L	C	C	C
164	82	90	96	100	100	100		164	L	L	L	C	C	C
165	83	90	97	99	100	100		165	L	L	L	L	C	C
166	82	90	96	100	100	100		166	L	L	L	C	C	C
167	83	90	96	99	100	100		167	L	L	L	L	C	C
168	82	90	96	99	100	100		168	L	L	L	L	C	C
169	83	90	96	100	100	100		169	L	L	L	C	C	C
170	83	89	96	99	100	100		170	L	L	L	L	C	C
171	82	89	96	99	100	100		171	L	L	L	L	C	C
172	82	89	96	100	100	100		172	L	L	L	C	C	C
173	82	90	96	99	100	100		173	L	L	L	L	C	C
174	83	90	96	99	100	100		174	L	L	L	L	C	C
175	82	89	96	99	100	100		175	L	L	L	L	C	C
176	82	89	96	99	100	100		176	L	L	L	L	C	C
177	81	89	96	99	100	100		177	L	L	L	L	C	C
178	82	89	96	99	100	100		178	L	L	L	L	C	C
179	81	89	96	99	100	100		179	L	L	L	L	C	C
180	81	89	96	99	100	100		180	L	L	L	L	C	C
181	81	89	96	99	100	100		181	L	L	L	L	C	C
182	81	89	95	99	100	100		182	L	L	L	L	C	C
183	81	89	96	99	100	100		183	L	L	L	L	C	C
184	81	88	96	99	100	100		184	L	L	L	L	C	C
185	82	88	95	99	100	100		185	L	L	L	L	C	C
186	81	89	95	100	100	100		186	L	L	L	C	C	C
187	81	89	95	99	100	100		187	L	L	L	L	C	C
188	80	88	96	99	100	100		188	L	L	L	L	C	C
189	81	89	95	99	100	100		189	L	L	L	L	C	C
190	81	88	96	99	100	100		190	L	L	L	L	C	C
191	81	88	95	99	100	100		191	L	L	L	L	C	C
192	80	89	95	99	100	100		192	L	L	L	L	C	C
193	81	88	95	99	100	100		193	L	L	L	L	C	C
194	81	88	95	99	100	100		194	L	L	L	L	C	C
195	80	88	95	99	100	100		195	L	L	L	L	C	C
196	81	88	95	99	100	100		196	L	L	L	L	C	C
197	81	87	95	99	100	100		197	L	L	L	L	C	C
198	81	88	95	99	100	100		198	L	L	L	L	C	C
199	81	88	95	99	100	100		199	L	L	L	L	C	C
200	80	88	95	99	100	100		200	L	L	L	L	C	C

## Sheet: BaTiO3
ENP Diameter (nm)/Zeta potential (mV)	-50	-40	-30	-20	-10	0			-50	-40	-30	-20	-10	0
1	100	100	100	100	100	100		1	C	C	C	C	C	C
2	100	100	100	100	100	100		2	C	C	C	C	C	C
3	100	100	100	100	100	100		3	C	C	C	C	C	C
4	100	100	100	100	100	100		4	C	C	C	C	C	C
5	100	100	100	100	100	100		5	C	C	C	C	C	C
6	100	100	100	100	100	100		6	C	C	C	C	C	C
7	100	100	100	100	100	100		7	C	C	C	C	C	C
8	100	100	100	100	100	100		8	C	C	C	C	C	C
9	100	100	100	100	100	100		9	C	C	C	C	C	C
10	100	100	100	100	100	100		10	C	C	C	C	C	C
11	100	100	100	100	100	100		11	C	C	C	C	C	C
12	100	100	100	100	100	100		12	C	C	C	C	C	C
13	100	100	100	100	100	100		13	C	C	C	C	C	C
14	100	100	100	100	100	100		14	C	C	C	C	C	C
15	100	100	100	100	100	100		15	C	C	C	C	C	C
16	100	100	100	100	100	100		16	C	C	C	C	C	C
17	100	100	100	100	100	100		17	C	C	C	C	C	C
18	100	100	100	100	100	100		18	C	C	C	C	C	C
19	100	100	100	100	100	100		19	C	C	C	C	C	C
20	100	100	100	100	100	100		20	C	C	C	C	C	C
21	100	100	100	100	100	100		21	C	C	C	C	C	C
22	100	100	100	100	100	100		22	C	C	C	C	C	C
23	100	100	100	100	100	100		23	C	C	C	C	C	C
24	100	100	100	100	100	100		24	C	C	C	C	C	C
25	100	100	100	100	100	100		25	C	C	C	C	C	C
26	100	100	100	100	100	100		26	C	C	C	C	C	C
27	100	100	100	100	100	100		27	C	C	C	C	C	C
28	100	100	100	100	100	100		28	C	C	C	C	C	C
29	100	100	100	100	100	100		29	C	C	C	C	C	C
30	100	100	100	100	100	100		30	C	C	C	C	C	C
31	100	100	100	100	100	100		31	C	C	C	C	C	C
32	100	100	100	100	100	100		32	C	C	C	C	C	C
33	100	100	100	100	100	100		33	C	C	C	C	C	C
34	100	100	100	100	100	100		34	C	C	C	C	C	C
35	99	100	100	100	100	100		35	L	C	C	C	C	C
36	99	100	100	100	100	100		36	L	C	C	C	C	C
37	99	100	100	100	100	100		37	L	C	C	C	C	C
38	99	100	100	100	100	100		38	L	C	C	C	C	C
39	99	100	100	100	100	100		39	L	C	C	C	C	C
40	98	100	100	100	100	100		40	L	C	C	C	C	C
41	98	100	100	100	100	100		41	L	C	C	C	C	C
42	97	100	100	100	100	100		42	L	C	C	C	C	C
43	97	100	100	100	100	100		43	L	C	C	C	C	C
44	97	99	100	100	100	100		44	L	L	C	C	C	C
45	96	99	100	100	100	100		45	L	L	C	C	C	C
46	96	99	100	100	100	100		46	L	L	C	C	C	C
47	95	99	100	100	100	100		47	L	L	C	C	C	C
48	95	99	100	100	100	100		48	L	L	C	C	C	C
49	95	99	100	100	100	100		49	L	L	C	C	C	C
50	94	99	100	100	100	100		50	L	L	C	C	C	C
51	93	98	100	100	100	100		51	L	L	C	C	C	C
52	93	98	100	100	100	100		52	L	L	C	C	C	C
53	92	98	100	100	100	100		53	L	L	C	C	C	C
54	92	98	100	100	100	100		54	L	L	C	C	C	C
55	91	97	100	100	100	100		55	L	L	C	C	C	C
56	90	97	100	100	100	100		56	L	L	C	C	C	C
57	90	97	100	100	100	100		57	L	L	C	C	C	C
58	90	97	100	100	100	100		58	L	L	C	C	C	C
59	89	96	100	100	100	100		59	L	L	C	C	C	C
60	88	96	100	100	100	100		60	L	L	C	C	C	C
61	88	96	100	100	100	100		61	L	L	C	C	C	C
62	87	95	100	100	100	100		62	L	L	C	C	C	C
63	87	95	99	100	100	100		63	L	L	L	C	C	C
64	86	95	99	100	100	100		64	L	L	L	C	C	C
65	86	94	99	100	100	100		65	L	L	L	C	C	C
66	85	94	99	100	100	100		66	L	L	L	C	C	C
67	85	94	99	100	100	100		67	L	L	L	C	C	C
68	84	94	99	100	100	100		68	L	L	L	C	C	C
69	84	94	99	100	100	100		69	L	L	L	C	C	C
70	83	93	99	100	100	100		70	L	L	L	C	C	C
71	83	92	99	100	100	100		71	L	L	L	C	C	C
72	82	92	99	100	100	100		72	L	L	L	C	C	C
73	82	92	99	100	100	100		73	L	L	L	C	C	C
74	82	92	99	100	100	100		74	L	L	L	C	C	C
75	81	91	98	100	100	100		75	L	L	L	C	C	C
76	80	91	98	100	100	100		76	L	L	L	C	C	C
77	80	91	98	100	100	100		77	L	L	L	C	C	C
78	80	91	98	100	100	100		78	L	L	L	C	C	C
79	79	90	98	100	100	100		79	L	L	L	C	C	C
80	79	90	98	100	100	100		80	L	L	L	C	C	C
81	78	90	98	100	100	100		81	L	L	L	C	C	C
82	78	89	98	100	100	100		82	L	L	L	C	C	C
83	77	88	97	100	100	100		83	L	L	L	C	C	C
84	77	88	97	100	100	100		84	L	L	L	C	C	C
85	77	88	97	100	100	100		85	L	L	L	C	C	C
86	76	88	97	100	100	100		86	L	L	L	C	C	C
87	76	88	97	100	100	100		87	L	L	L	C	C	C
88	76	88	97	100	100	100		88	L	L	L	C	C	C
89	76	87	97	100	100	100		89	L	L	L	C	C	C
90	75	87	97	100	100	100		90	L	L	L	C	C	C
91	75	86	96	100	100	100		91	L	L	L	C	C	C
92	75	87	96	100	100	100		92	L	L	L	C	C	C
93	75	86	96	100	100	100		93	L	L	L	C	C	C
94	74	86	96	100	100	100		94	U	L	L	C	C	C
95	74	86	96	100	100	100		95	U	L	L	C	C	C
96	74	85	96	100	100	100		96	U	L	L	C	C	C
97	73	85	96	100	100	100		97	U	L	L	C	C	C
98	74	85	95	100	100	100		98	U	L	L	C	C	C
99	73	85	95	100	100	100		99	U	L	L	C	C	C
100	72	85	95	100	100	100		100	U	L	L	C	C	C
101	72	84	95	100	100	100		101	U	L	L	C	C	C
102	72	84	95	100	100	100		102	U	L	L	C	C	C
103	72	83	94	100	100	100		103	U	L	L	C	C	C
104	71	84	95	100	100	100		104	U	L	L	C	C	C
105	71	84	94	100	100	100		105	U	L	L	C	C	C
106	70	84	95	100	100	100		106	U	L	L	C	C	C
107	71	83	94	100	100	100		107	U	L	L	C	C	C
108	70	83	94	100	100	100		108	U	L	L	C	C	C
109	70	82	94	100	100	100		109	U	L	L	C	C	C
110	70	83	94	100	100	100		110	U	L	L	C	C	C
111	69	82	93	100	100	100		111	U	L	L	C	C	C
112	70	81	94	100	100	100		112	U	L	L	C	C	C
113	69	81	93	99	100	100		113	U	L	L	L	C	C
114	69	82	93	99	100	100		114	U	L	L	L	C	C
115	68	82	93	99	100	100		115	U	L	L	L	C	C
116	68	81	93	99	100	100		116	U	L	L	L	C	C
117	67	81	93	99	100	100		117	U	L	L	L	C	C
118	69	80	93	99	100	100		118	U	L	L	L	C	C
119	69	81	93	99	100	100		119	U	L	L	L	C	C
120	67	80	92	99	100	100		120	U	L	L	L	C	C
121	68	80	93	99	100	100		121	U	L	L	L	C	C
122	68	81	92	99	100	100		122	U	L	L	L	C	C
123	67	79	92	99	100	100		123	U	L	L	L	C	C
124	67	80	92	99	100	100		124	U	L	L	L	C	C
125	67	80	92	99	100	100		125	U	L	L	L	C	C
126	66	79	92	99	100	100		126	U	L	L	L	C	C
127	65	79	92	99	100	100		127	U	L	L	L	C	C
128	66	79	91	99	100	100		128	U	L	L	L	C	C
129	67	79	91	99	100	100		129	U	L	L	L	C	C
130	66	79	91	99	100	100		130	U	L	L	L	C	C
131	66	78	91	99	100	100		131	U	L	L	L	C	C
132	65	78	91	99	100	100		132	U	L	L	L	C	C
133	66	78	91	99	100	100		133	U	L	L	L	C	C
134	65	78	91	99	100	100		134	U	L	L	L	C	C
135	65	78	91	99	100	100		135	U	L	L	L	C	C
136	64	78	91	99	100	100		136	U	L	L	L	C	C
137	65	77	91	99	100	100		137	U	L	L	L	C	C
138	65	77	91	99	100	100		138	U	L	L	L	C	C
139	65	78	90	99	100	100		139	U	L	L	L	C	C
140	64	77	91	99	100	100		140	U	L	L	L	C	C
141	64	77	90	99	100	100		141	U	L	L	L	C	C
142	64	78	90	98	100	100		142	U	L	L	L	C	C
143	64	77	90	98	100	100		143	U	L	L	L	C	C
144	63	77	90	99	100	100		144	U	L	L	L	C	C
145	63	76	89	99	100	100		145	U	L	L	L	C	C
146	63	77	90	98	100	100		146	U	L	L	L	C	C
147	63	76	90	99	100	100		147	U	L	L	L	C	C
148	63	76	89	98	100	100		148	U	L	L	L	C	C
149	63	76	90	98	100	100		149	U	L	L	L	C	C
150	62	76	89	98	100	100		150	U	L	L	L	C	C
151	63	75	89	98	100	100		151	U	L	L	L	C	C
152	62	76	89	98	100	100		152	U	L	L	L	C	C
153	62	76	89	98	100	100		153	U	L	L	L	C	C
154	62	75	89	98	100	100		154	U	L	L	L	C	C
155	62	74	88	98	100	100		155	U	U	L	L	C	C
156	62	75	88	98	100	100		156	U	L	L	L	C	C
157	62	75	88	98	100	100		157	U	L	L	L	C	C
158	61	75	89	98	100	100		158	U	L	L	L	C	C
159	61	75	88	98	100	100		159	U	L	L	L	C	C
160	61	75	88	98	100	100		160	U	L	L	L	C	C
161	61	75	89	98	100	100		161	U	L	L	L	C	C
162	61	75	88	98	100	100		162	U	L	L	L	C	C
163	61	74	88	98	100	100		163	U	U	L	L	C	C
164	61	74	88	98	100	100		164	U	U	L	L	C	C
165	61	74	88	98	100	100		165	U	U	L	L	C	C
166	62	74	88	98	100	100		166	U	U	L	L	C	C
167	60	73	87	98	100	100		167	U	U	L	L	C	C
168	59	74	88	97	100	100		168	U	U	L	L	C	C
169	60	73	88	98	100	100		169	U	U	L	L	C	C
170	60	74	87	97	100	100		170	U	U	L	L	C	C
171	60	73	87	97	100	100		171	U	U	L	L	C	C
172	60	73	87	97	100	100		172	U	U	L	L	C	C
173	61	74	87	98	100	100		173	U	U	L	L	C	C
174	60	73	87	97	100	100		174	U	U	L	L	C	C
175	60	72	87	97	100	100		175	U	U	L	L	C	C
176	60	73	87	97	100	100		176	U	U	L	L	C	C
177	60	74	87	97	100	100		177	U	U	L	L	C	C
178	60	73	87	97	100	100		178	U	U	L	L	C	C
179	58	73	86	97	100	100		179	U	U	L	L	C	C
180	60	72	86	97	100	100		180	U	U	L	L	C	C
181	59	73	86	97	100	100		181	U	U	L	L	C	C
182	60	72	87	97	100	100		182	U	U	L	L	C	C
183	59	72	87	97	100	100		183	U	U	L	L	C	C
184	60	73	86	97	100	100		184	U	U	L	L	C	C
185	59	72	86	97	100	100		185	U	U	L	L	C	C
186	59	72	86	97	100	100		186	U	U	L	L	C	C
187	60	72	87	97	100	100		187	U	U	L	L	C	C
188	58	72	86	97	100	100		188	U	U	L	L	C	C
189	60	72	85	97	100	100		189	U	U	L	L	C	C
190	59	71	86	97	100	100		190	U	U	L	L	C	C
191	58	72	86	97	100	100		191	U	U	L	L	C	C
192	58	71	86	97	100	100		192	U	U	L	L	C	C
193	59	72	86	97	100	100		193	U	U	L	L	C	C
194	58	71	86	97	100	100		194	U	U	L	L	C	C
195	58	71	86	97	100	100		195	U	U	L	L	C	C
196	58	71	86	97	100	100		196	U	U	L	L	C	C
197	58	71	85	96	100	100		197	U	U	L	L	C	C
198	58	71	86	97	100	100		198	U	U	L	L	C	C
199	57	71	85	97	100	100		199	U	U	L	L	C	C
200	58	70	85	96	100	100		200	U	U	L	L	C	C

## Sheet: Be
ENP Diameter (nm)/Zeta potential (mV)	-50	-40	-30	-20	-10	0			-50	-40	-30	-20	-10	0
1	100	100	100	100	100	100		1	C	C	C	C	C	C
2	100	100	100	100	100	100		2	C	C	C	C	C	C
3	100	100	100	100	100	100		3	C	C	C	C	C	C
4	100	100	100	100	100	100		4	C	C	C	C	C	C
5	100	100	100	100	100	100		5	C	C	C	C	C	C
6	100	100	100	100	100	100		6	C	C	C	C	C	C
7	100	100	100	100	100	100		7	C	C	C	C	C	C
8	100	100	100	100	100	100		8	C	C	C	C	C	C
9	100	100	100	100	100	100		9	C	C	C	C	C	C
10	100	100	100	100	100	100		10	C	C	C	C	C	C
11	100	100	100	100	100	100		11	C	C	C	C	C	C
12	100	100	100	100	100	100		12	C	C	C	C	C	C
13	100	100	100	100	100	100		13	C	C	C	C	C	C
14	100	100	100	100	100	100		14	C	C	C	C	C	C
15	100	100	100	100	100	100		15	C	C	C	C	C	C
16	100	100	100	100	100	100		16	C	C	C	C	C	C
17	100	100	100	100	100	100		17	C	C	C	C	C	C
18	100	100	100	100	100	100		18	C	C	C	C	C	C
19	100	100	100	100	100	100		19	C	C	C	C	C	C
20	100	100	100	100	100	100		20	C	C	C	C	C	C
21	100	100	100	100	100	100		21	C	C	C	C	C	C
22	100	100	100	100	100	100		22	C	C	C	C	C	C
23	100	100	100	100	100	100		23	C	C	C	C	C	C
24	100	100	100	100	100	100		24	C	C	C	C	C	C
25	100	100	100	100	100	100		25	C	C	C	C	C	C
26	100	100	100	100	100	100		26	C	C	C	C	C	C
27	100	100	100	100	100	100		27	C	C	C	C	C	C
28	100	100	100	100	100	100		28	C	C	C	C	C	C
29	100	100	100	100	100	100		29	C	C	C	C	C	C
30	100	100	100	100	100	100		30	C	C	C	C	C	C
31	100	100	100	100	100	100		31	C	C	C	C	C	C
32	100	100	100	100	100	100		32	C	C	C	C	C	C
33	100	100	100	100	100	100		33	C	C	C	C	C	C
34	100	100	100	100	100	100		34	C	C	C	C	C	C
35	100	100	100	100	100	100		35	C	C	C	C	C	C
36	100	100	100	100	100	100		36	C	C	C	C	C	C
37	100	100	100	100	100	100		37	C	C	C	C	C	C
38	100	100	100	100	100	100		38	C	C	C	C	C	C
39	100	100	100	100	100	100		39	C	C	C	C	C	C
40	100	100	100	100	100	100		40	C	C	C	C	C	C
41	100	100	100	100	100	100		41	C	C	C	C	C	C
42	99	100	100	100	100	100		42	L	C	C	C	C	C
43	99	100	100	100	100	100		43	L	C	C	C	C	C
44	99	100	100	100	100	100		44	L	C	C	C	C	C
45	99	100	100	100	100	100		45	L	C	C	C	C	C
46	99	100	100	100	100	100		46	L	C	C	C	C	C
47	99	100	100	100	100	100		47	L	C	C	C	C	C
48	98	100	100	100	100	100		48	L	C	C	C	C	C
49	98	100	100	100	100	100		49	L	C	C	C	C	C
50	98	100	100	100	100	100		50	L	C	C	C	C	C
51	98	100	100	100	100	100		51	L	C	C	C	C	C
52	98	100	100	100	100	100		52	L	C	C	C	C	C
53	98	100	100	100	100	100		53	L	C	C	C	C	C
54	98	100	100	100	100	100		54	L	C	C	C	C	C
55	97	99	100	100	100	100		55	L	L	C	C	C	C
56	97	99	100	100	100	100		56	L	L	C	C	C	C
57	97	99	100	100	100	100		57	L	L	C	C	C	C
58	97	99	100	100	100	100		58	L	L	C	C	C	C
59	96	99	100	100	100	100		59	L	L	C	C	C	C
60	97	99	100	100	100	100		60	L	L	C	C	C	C
61	96	99	100	100	100	100		61	L	L	C	C	C	C
62	96	99	100	100	100	100		62	L	L	C	C	C	C
63	96	99	100	100	100	100		63	L	L	C	C	C	C
64	95	99	100	100	100	100		64	L	L	C	C	C	C
65	95	98	100	100	100	100		65	L	L	C	C	C	C
66	95	98	100	100	100	100		66	L	L	C	C	C	C
67	95	99	100	100	100	100		67	L	L	C	C	C	C
68	95	98	100	100	100	100		68	L	L	C	C	C	C
69	95	98	100	100	100	100		69	L	L	C	C	C	C
70	94	98	100	100	100	100		70	L	L	C	C	C	C
71	94	98	100	100	100	100		71	L	L	C	C	C	C
72	94	98	100	100	100	100		72	L	L	C	C	C	C
73	94	98	100	100	100	100		73	L	L	C	C	C	C
74	93	98	100	100	100	100		74	L	L	C	C	C	C
75	94	98	100	100	100	100		75	L	L	C	C	C	C
76	93	98	100	100	100	100		76	L	L	C	C	C	C
77	93	98	99	100	100	100		77	L	L	L	C	C	C
78	93	97	100	100	100	100		78	L	L	C	C	C	C
79	92	97	99	100	100	100		79	L	L	L	C	C	C
80	92	97	100	100	100	100		80	L	L	C	C	C	C
81	92	97	99	100	100	100		81	L	L	L	C	C	C
82	92	97	99	100	100	100		82	L	L	L	C	C	C
83	92	97	99	100	100	100		83	L	L	L	C	C	C
84	92	96	99	100	100	100		84	L	L	L	C	C	C
85	92	97	100	100	100	100		85	L	L	C	C	C	C
86	91	97	99	100	100	100		86	L	L	L	C	C	C
87	91	96	99	100	100	100		87	L	L	L	C	C	C
88	91	96	99	100	100	100		88	L	L	L	C	C	C
89	91	97	99	100	100	100		89	L	L	L	C	C	C
90	90	96	99	100	100	100		90	L	L	L	C	C	C
91	91	96	99	100	100	100		91	L	L	L	C	C	C
92	91	95	99	100	100	100		92	L	L	L	C	C	C
93	90	96	99	100	100	100		93	L	L	L	C	C	C
94	90	96	99	100	100	100		94	L	L	L	C	C	C
95	90	96	99	100	100	100		95	L	L	L	C	C	C
96	90	96	99	100	100	100		96	L	L	L	C	C	C
97	90	95	99	100	100	100		97	L	L	L	C	C	C
98	90	95	99	100	100	100		98	L	L	L	C	C	C
99	89	95	99	100	100	100		99	L	L	L	C	C	C
100	89	95	99	100	100	100		100	L	L	L	C	C	C
101	89	95	99	100	100	100		101	L	L	L	C	C	C
102	89	95	99	100	100	100		102	L	L	L	C	C	C
103	89	95	98	100	100	100		103	L	L	L	C	C	C
104	89	95	98	100	100	100		104	L	L	L	C	C	C
105	89	95	99	100	100	100		105	L	L	L	C	C	C
106	88	94	99	100	100	100		106	L	L	L	C	C	C
107	89	94	99	100	100	100		107	L	L	L	C	C	C
108	88	94	98	100	100	100		108	L	L	L	C	C	C
109	88	94	98	100	100	100		109	L	L	L	C	C	C
110	88	94	98	100	100	100		110	L	L	L	C	C	C
111	87	94	98	100	100	100		111	L	L	L	C	C	C
112	88	94	98	100	100	100		112	L	L	L	C	C	C
113	88	94	99	100	100	100		113	L	L	L	C	C	C
114	87	93	98	100	100	100		114	L	L	L	C	C	C
115	87	94	98	100	100	100		115	L	L	L	C	C	C
116	86	94	98	100	100	100		116	L	L	L	C	C	C
117	87	93	98	100	100	100		117	L	L	L	C	C	C
118	87	93	98	100	100	100		118	L	L	L	C	C	C
119	87	93	98	100	100	100		119	L	L	L	C	C	C
120	87	93	98	100	100	100		120	L	L	L	C	C	C
121	87	93	98	100	100	100		121	L	L	L	C	C	C
122	86	93	98	100	100	100		122	L	L	L	C	C	C
123	86	93	98	100	100	100		123	L	L	L	C	C	C
124	86	93	98	100	100	100		124	L	L	L	C	C	C
125	87	93	98	100	100	100		125	L	L	L	C	C	C
126	87	93	98	100	100	100		126	L	L	L	C	C	C
127	86	93	98	100	100	100		127	L	L	L	C	C	C
128	86	92	98	100	100	100		128	L	L	L	C	C	C
129	85	92	97	100	100	100		129	L	L	L	C	C	C
130	85	92	98	100	100	100		130	L	L	L	C	C	C
131	86	92	98	100	100	100		131	L	L	L	C	C	C
132	86	92	98	100	100	100		132	L	L	L	C	C	C
133	85	92	97	100	100	100		133	L	L	L	C	C	C
134	85	91	97	100	100	100		134	L	L	L	C	C	C
135	85	92	98	100	100	100		135	L	L	L	C	C	C
136	85	92	97	100	100	100		136	L	L	L	C	C	C
137	85	92	97	100	100	100		137	L	L	L	C	C	C
138	85	92	97	100	100	100		138	L	L	L	C	C	C
139	85	91	97	100	100	100		139	L	L	L	C	C	C
140	85	92	97	100	100	100		140	L	L	L	C	C	C
141	85	92	97	100	100	100		141	L	L	L	C	C	C
142	84	91	97	100	100	100		142	L	L	L	C	C	C
143	83	91	97	100	100	100		143	L	L	L	C	C	C
144	84	91	97	100	100	100		144	L	L	L	C	C	C
145	84	92	97	100	100	100		145	L	L	L	C	C	C
146	84	92	97	100	100	100		146	L	L	L	C	C	C
147	84	91	97	100	100	100		147	L	L	L	C	C	C
148	84	91	97	100	100	100		148	L	L	L	C	C	C
149	83	91	97	100	100	100		149	L	L	L	C	C	C
150	84	91	97	100	100	100		150	L	L	L	C	C	C
151	84	91	97	100	100	100		151	L	L	L	C	C	C
152	84	91	97	100	100	100		152	L	L	L	C	C	C
153	84	91	97	100	100	100		153	L	L	L	C	C	C
154	84	91	97	100	100	100		154	L	L	L	C	C	C
155	84	90	97	100	100	100		155	L	L	L	C	C	C
156	84	91	97	100	100	100		156	L	L	L	C	C	C
157	83	91	96	100	100	100		157	L	L	L	C	C	C
158	83	90	96	100	100	100		158	L	L	L	C	C	C
159	83	90	97	100	100	100		159	L	L	L	C	C	C
160	83	91	96	100	100	100		160	L	L	L	C	C	C
161	82	90	96	100	100	100		161	L	L	L	C	C	C
162	83	90	96	100	100	100		162	L	L	L	C	C	C
163	83	90	97	100	100	100		163	L	L	L	C	C	C
164	83	90	97	99	100	100		164	L	L	L	L	C	C
165	83	90	96	100	100	100		165	L	L	L	C	C	C
166	83	90	96	100	100	100		166	L	L	L	C	C	C
167	82	90	96	99	100	100		167	L	L	L	L	C	C
168	82	90	96	100	100	100		168	L	L	L	C	C	C
169	82	90	96	100	100	100		169	L	L	L	C	C	C
170	83	89	96	99	100	100		170	L	L	L	L	C	C
171	82	90	96	99	100	100		171	L	L	L	L	C	C
172	82	90	96	100	100	100		172	L	L	L	C	C	C
173	82	89	96	99	100	100		173	L	L	L	L	C	C
174	82	89	97	100	100	100		174	L	L	L	C	C	C
175	82	90	96	99	100	100		175	L	L	L	L	C	C
176	82	89	96	99	100	100		176	L	L	L	L	C	C
177	82	89	96	99	100	100		177	L	L	L	L	C	C
178	82	89	96	99	100	100		178	L	L	L	L	C	C
179	82	90	96	99	100	100		179	L	L	L	L	C	C
180	82	89	96	99	100	100		180	L	L	L	L	C	C
181	82	89	96	99	100	100		181	L	L	L	L	C	C
182	82	90	95	99	100	100		182	L	L	L	L	C	C
183	81	89	96	99	100	100		183	L	L	L	L	C	C
184	82	89	96	99	100	100		184	L	L	L	L	C	C
185	81	90	96	99	100	100		185	L	L	L	L	C	C
186	82	90	96	99	100	100		186	L	L	L	L	C	C
187	82	89	96	99	100	100		187	L	L	L	L	C	C
188	81	89	96	99	100	100		188	L	L	L	L	C	C
189	81	89	96	99	100	100		189	L	L	L	L	C	C
190	81	89	96	99	100	100		190	L	L	L	L	C	C
191	81	89	95	99	100	100		191	L	L	L	L	C	C
192	81	89	96	99	100	100		192	L	L	L	L	C	C
193	82	88	95	99	100	100		193	L	L	L	L	C	C
194	82	89	95	99	100	100		194	L	L	L	L	C	C
195	82	89	96	99	100	100		195	L	L	L	L	C	C
196	82	88	95	99	100	100		196	L	L	L	L	C	C
197	81	89	95	99	100	100		197	L	L	L	L	C	C
198	81	88	96	99	100	100		198	L	L	L	L	C	C
199	80	89	95	99	100	100		199	L	L	L	L	C	C
200	80	88	95	99	100	100		200	L	L	L	L	C	C

## Sheet: BeO
ENP Diameter (nm)/Zeta potential (mV)	-50	-40	-30	-20	-10	0			-50	-40	-30	-20	-10	0
1	100	100	100	100	100	100		1	C	C	C	C	C	C
2	100	100	100	100	100	100		2	C	C	C	C	C	C
3	100	100	100	100	100	100		3	C	C	C	C	C	C
4	100	100	100	100	100	100		4	C	C	C	C	C	C
5	100	100	100	100	100	100		5	C	C	C	C	C	C
6	100	100	100	100	100	100		6	C	C	C	C	C	C
7	100	100	100	100	100	100		7	C	C	C	C	C	C
8	100	100	100	100	100	100		8	C	C	C	C	C	C
9	100	100	100	100	100	100		9	C	C	C	C	C	C
10	100	100	100	100	100	100		10	C	C	C	C	C	C
11	100	100	100	100	100	100		11	C	C	C	C	C	C
12	100	100	100	100	100	100		12	C	C	C	C	C	C
13	100	100	100	100	100	100		13	C	C	C	C	C	C
14	100	100	100	100	100	100		14	C	C	C	C	C	C
15	100	100	100	100	100	100		15	C	C	C	C	C	C
16	100	100	100	100	100	100		16	C	C	C	C	C	C
17	100	100	100	100	100	100		17	C	C	C	C	C	C
18	100	100	100	100	100	100		18	C	C	C	C	C	C
19	100	100	100	100	100	100		19	C	C	C	C	C	C
20	100	100	100	100	100	100		20	C	C	C	C	C	C
21	100	100	100	100	100	100		21	C	C	C	C	C	C
22	100	100	100	100	100	100		22	C	C	C	C	C	C
23	100	100	100	100	100	100		23	C	C	C	C	C	C
24	100	100	100	100	100	100		24	C	C	C	C	C	C
25	100	100	100	100	100	100		25	C	C	C	C	C	C
26	100	100	100	100	100	100		26	C	C	C	C	C	C
27	100	100	100	100	100	100		27	C	C	C	C	C	C
28	100	100	100	100	100	100		28	C	C	C	C	C	C
29	100	100	100	100	100	100		29	C	C	C	C	C	C
30	100	100	100	100	100	100		30	C	C	C	C	C	C
31	100	100	100	100	100	100		31	C	C	C	C	C	C
32	100	100	100	100	100	100		32	C	C	C	C	C	C
33	100	100	100	100	100	100		33	C	C	C	C	C	C
34	100	100	100	100	100	100		34	C	C	C	C	C	C
35	99	100	100	100	100	100		35	L	C	C	C	C	C
36	99	100	100	100	100	100		36	L	C	C	C	C	C
37	99	100	100	100	100	100		37	L	C	C	C	C	C
38	99	100	100	100	100	100		38	L	C	C	C	C	C
39	98	100	100	100	100	100		39	L	C	C	C	C	C
40	98	100	100	100	100	100		40	L	C	C	C	C	C
41	98	100	100	100	100	100		41	L	C	C	C	C	C
42	97	100	100	100	100	100		42	L	C	C	C	C	C
43	97	100	100	100	100	100		43	L	C	C	C	C	C
44	96	99	100	100	100	100		44	L	L	C	C	C	C
45	96	99	100	100	100	100		45	L	L	C	C	C	C
46	95	99	100	100	100	100		46	L	L	C	C	C	C
47	95	99	100	100	100	100		47	L	L	C	C	C	C
48	94	99	100	100	100	100		48	L	L	C	C	C	C
49	93	99	100	100	100	100		49	L	L	C	C	C	C
50	93	98	100	100	100	100		50	L	L	C	C	C	C
51	93	98	100	100	100	100		51	L	L	C	C	C	C
52	92	98	100	100	100	100		52	L	L	C	C	C	C
53	92	98	100	100	100	100		53	L	L	C	C	C	C
54	91	98	100	100	100	100		54	L	L	C	C	C	C
55	90	97	100	100	100	100		55	L	L	C	C	C	C
56	90	97	100	100	100	100		56	L	L	C	C	C	C
57	89	97	100	100	100	100		57	L	L	C	C	C	C
58	88	97	100	100	100	100		58	L	L	C	C	C	C
59	88	96	100	100	100	100		59	L	L	C	C	C	C
60	88	96	100	100	100	100		60	L	L	C	C	C	C
61	87	96	100	100	100	100		61	L	L	C	C	C	C
62	86	95	99	100	100	100		62	L	L	L	C	C	C
63	86	94	99	100	100	100		63	L	L	L	C	C	C
64	86	94	99	100	100	100		64	L	L	L	C	C	C
65	86	94	99	100	100	100		65	L	L	L	C	C	C
66	84	94	99	100	100	100		66	L	L	L	C	C	C
67	84	93	99	100	100	100		67	L	L	L	C	C	C
68	83	93	99	100	100	100		68	L	L	L	C	C	C
69	82	93	99	100	100	100		69	L	L	L	C	C	C
70	82	92	99	100	100	100		70	L	L	L	C	C	C
71	81	92	99	100	100	100		71	L	L	L	C	C	C
72	81	93	99	100	100	100		72	L	L	L	C	C	C
73	81	92	99	100	100	100		73	L	L	L	C	C	C
74	80	91	98	100	100	100		74	L	L	L	C	C	C
75	80	91	98	100	100	100		75	L	L	L	C	C	C
76	79	90	98	100	100	100		76	L	L	L	C	C	C
77	79	90	98	100	100	100		77	L	L	L	C	C	C
78	79	90	98	100	100	100		78	L	L	L	C	C	C
79	78	89	98	100	100	100		79	L	L	L	C	C	C
80	77	89	97	100	100	100		80	L	L	L	C	C	C
81	77	89	98	100	100	100		81	L	L	L	C	C	C
82	77	88	97	100	100	100		82	L	L	L	C	C	C
83	77	88	97	100	100	100		83	L	L	L	C	C	C
84	76	88	97	100	100	100		84	L	L	L	C	C	C
85	77	88	97	100	100	100		85	L	L	L	C	C	C
86	75	87	97	100	100	100		86	L	L	L	C	C	C
87	75	87	97	100	100	100		87	L	L	L	C	C	C
88	74	88	97	100	100	100		88	U	L	L	C	C	C
89	75	87	96	100	100	100		89	L	L	L	C	C	C
90	74	87	96	100	100	100		90	U	L	L	C	C	C
91	73	87	96	100	100	100		91	U	L	L	C	C	C
92	74	86	96	100	100	100		92	U	L	L	C	C	C
93	73	86	95	100	100	100		93	U	L	L	C	C	C
94	73	86	95	100	100	100		94	U	L	L	C	C	C
95	72	84	95	100	100	100		95	U	L	L	C	C	C
96	72	85	96	100	100	100		96	U	L	L	C	C	C
97	72	84	95	100	100	100		97	U	L	L	C	C	C
98	71	84	95	100	100	100		98	U	L	L	C	C	C
99	71	83	95	100	100	100		99	U	L	L	C	C	C
100	72	83	95	100	100	100		100	U	L	L	C	C	C
101	70	83	95	100	100	100		101	U	L	L	C	C	C
102	70	83	94	100	100	100		102	U	L	L	C	C	C
103	70	83	94	100	100	100		103	U	L	L	C	C	C
104	70	83	94	100	100	100		104	U	L	L	C	C	C
105	70	82	94	100	100	100		105	U	L	L	C	C	C
106	69	83	94	100	100	100		106	U	L	L	C	C	C
107	69	82	94	100	100	100		107	U	L	L	C	C	C
108	68	82	94	100	100	100		108	U	L	L	C	C	C
109	68	81	94	99	100	100		109	U	L	L	L	C	C
110	69	81	93	99	100	100		110	U	L	L	L	C	C
111	68	81	93	99	100	100		111	U	L	L	L	C	C
112	68	81	93	99	100	100		112	U	L	L	L	C	C
113	68	81	93	99	100	100		113	U	L	L	L	C	C
114	67	80	93	99	100	100		114	U	L	L	L	C	C
115	67	80	93	99	100	100		115	U	L	L	L	C	C
116	67	79	93	99	100	100		116	U	L	L	L	C	C
117	67	80	92	99	100	100		117	U	L	L	L	C	C
118	66	80	92	99	100	100		118	U	L	L	L	C	C
119	67	80	92	99	100	100		119	U	L	L	L	C	C
120	65	79	92	99	100	100		120	U	L	L	L	C	C
121	66	79	92	99	100	100		121	U	L	L	L	C	C
122	65	79	92	99	100	100		122	U	L	L	L	C	C
123	66	79	92	99	100	100		123	U	L	L	L	C	C
124	65	79	91	99	100	100		124	U	L	L	L	C	C
125	65	79	91	99	100	100		125	U	L	L	L	C	C
126	65	78	91	99	100	100		126	U	L	L	L	C	C
127	66	79	91	99	100	100		127	U	L	L	L	C	C
128	65	78	91	99	100	100		128	U	L	L	L	C	C
129	64	77	91	99	100	100		129	U	L	L	L	C	C
130	65	77	90	99	100	100		130	U	L	L	L	C	C
131	64	77	90	99	100	100		131	U	L	L	L	C	C
132	64	77	91	99	100	100		132	U	L	L	L	C	C
133	64	77	90	99	100	100		133	U	L	L	L	C	C
134	63	77	90	99	100	100		134	U	L	L	L	C	C
135	63	76	90	99	100	100		135	U	L	L	L	C	C
136	63	77	90	99	100	100		136	U	L	L	L	C	C
137	63	76	90	99	100	100		137	U	L	L	L	C	C
138	63	76	90	98	100	100		138	U	L	L	L	C	C
139	63	76	89	98	100	100		139	U	L	L	L	C	C
140	62	75	90	99	100	100		140	U	L	L	L	C	C
141	62	76	89	99	100	100		141	U	L	L	L	C	C
142	62	76	90	99	100	100		142	U	L	L	L	C	C
143	62	75	89	99	100	100		143	U	L	L	L	C	C
144	62	76	89	98	100	100		144	U	L	L	L	C	C
145	61	76	89	98	100	100		145	U	L	L	L	C	C
146	61	75	88	99	100	100		146	U	L	L	L	C	C
147	61	75	89	98	100	100		147	U	L	L	L	C	C
148	62	75	88	98	100	100		148	U	L	L	L	C	C
149	62	75	89	98	100	100		149	U	L	L	L	C	C
150	60	74	89	98	100	100		150	U	U	L	L	C	C
151	60	75	88	98	100	100		151	U	L	L	L	C	C
152	61	74	88	98	100	100		152	U	U	L	L	C	C
153	61	75	88	98	100	100		153	U	L	L	L	C	C
154	60	74	88	98	100	100		154	U	U	L	L	C	C
155	60	74	88	98	100	100		155	U	U	L	L	C	C
156	60	73	88	98	100	100		156	U	U	L	L	C	C
157	60	73	88	98	100	100		157	U	U	L	L	C	C
158	59	73	88	98	100	100		158	U	U	L	L	C	C
159	60	73	88	98	100	100		159	U	U	L	L	C	C
160	60	73	88	98	100	100		160	U	U	L	L	C	C
161	60	73	88	98	100	100		161	U	U	L	L	C	C
162	59	73	87	98	100	100		162	U	U	L	L	C	C
163	60	73	87	98	100	100		163	U	U	L	L	C	C
164	59	73	87	98	100	100		164	U	U	L	L	C	C
165	59	72	87	97	100	100		165	U	U	L	L	C	C
166	59	72	87	98	100	100		166	U	U	L	L	C	C
167	59	72	87	98	100	100		167	U	U	L	L	C	C
168	59	72	87	98	100	100		168	U	U	L	L	C	C
169	59	73	87	97	100	100		169	U	U	L	L	C	C
170	59	72	86	97	100	100		170	U	U	L	L	C	C
171	59	72	86	97	100	100		171	U	U	L	L	C	C
172	59	71	86	97	100	100		172	U	U	L	L	C	C
173	59	72	86	98	100	100		173	U	U	L	L	C	C
174	58	72	86	97	100	100		174	U	U	L	L	C	C
175	58	71	86	97	100	100		175	U	U	L	L	C	C
176	59	71	86	97	100	100		176	U	U	L	L	C	C
177	59	71	86	97	100	100		177	U	U	L	L	C	C
178	57	72	86	97	100	100		178	U	U	L	L	C	C
179	59	72	86	97	100	100		179	U	U	L	L	C	C
180	58	71	86	97	100	100		180	U	U	L	L	C	C
181	59	71	85	97	100	100		181	U	U	L	L	C	C
182	58	71	86	97	100	100		182	U	U	L	L	C	C
183	57	70	85	97	100	100		183	U	U	L	L	C	C
184	58	71	85	97	100	100		184	U	U	L	L	C	C
185	58	71	85	97	100	100		185	U	U	L	L	C	C
186	58	72	86	97	100	100		186	U	U	L	L	C	C
187	58	70	84	97	100	100		187	U	U	L	L	C	C
188	56	70	84	97	100	100		188	U	U	L	L	C	C
189	57	70	85	96	100	100		189	U	U	L	L	C	C
190	58	70	85	97	100	100		190	U	U	L	L	C	C
191	57	70	85	96	100	100		191	U	U	L	L	C	C
192	57	71	85	97	100	100		192	U	U	L	L	C	C
193	56	70	85	97	100	100		193	U	U	L	L	C	C
194	57	69	84	96	100	100		194	U	U	L	L	C	C
195	57	71	85	96	100	100		195	U	U	L	L	C	C
196	56	69	84	96	100	100		196	U	U	L	L	C	C
197	57	70	85	97	100	100		197	U	U	L	L	C	C
198	56	70	85	97	100	100		198	U	U	L	L	C	C
199	56	69	84	96	100	100		199	U	U	L	L	C	C
200	57	69	84	96	100	100		200	U	U	L	L	C	C

## Sheet: CaF2
ENP Diameter (nm)/Zeta potential (mV)	-50	-40	-30	-20	-10	0			-50	-40	-30	-20	-10	0
1	100	100	100	100	100	100		1	C	C	C	C	C	C
2	100	100	100	100	100	100		2	C	C	C	C	C	C
3	100	100	100	100	100	100		3	C	C	C	C	C	C
4	100	100	100	100	100	100		4	C	C	C	C	C	C
5	100	100	100	100	100	100		5	C	C	C	C	C	C
6	100	100	100	100	100	100		6	C	C	C	C	C	C
7	100	100	100	100	100	100		7	C	C	C	C	C	C
8	100	100	100	100	100	100		8	C	C	C	C	C	C
9	100	100	100	100	100	100		9	C	C	C	C	C	C
10	100	100	100	100	100	100		10	C	C	C	C	C	C
11	100	100	100	100	100	100		11	C	C	C	C	C	C
12	100	100	100	100	100	100		12	C	C	C	C	C	C
13	100	100	100	100	100	100		13	C	C	C	C	C	C
14	100	100	100	100	100	100		14	C	C	C	C	C	C
15	100	100	100	100	100	100		15	C	C	C	C	C	C
16	100	100	100	100	100	100		16	C	C	C	C	C	C
17	100	100	100	100	100	100		17	C	C	C	C	C	C
18	100	100	100	100	100	100		18	C	C	C	C	C	C
19	100	100	100	100	100	100		19	C	C	C	C	C	C
20	100	100	100	100	100	100		20	C	C	C	C	C	C
21	100	100	100	100	100	100		21	C	C	C	C	C	C
22	100	100	100	100	100	100		22	C	C	C	C	C	C
23	100	100	100	100	100	100		23	C	C	C	C	C	C
24	100	100	100	100	100	100		24	C	C	C	C	C	C
25	100	100	100	100	100	100		25	C	C	C	C	C	C
26	100	100	100	100	100	100		26	C	C	C	C	C	C
27	100	100	100	100	100	100		27	C	C	C	C	C	C
28	100	100	100	100	100	100		28	C	C	C	C	C	C
29	100	100	100	100	100	100		29	C	C	C	C	C	C
30	100	100	100	100	100	100		30	C	C	C	C	C	C
31	99	100	100	100	100	100		31	L	C	C	C	C	C
32	99	100	100	100	100	100		32	L	C	C	C	C	C
33	99	100	100	100	100	100		33	L	C	C	C	C	C
34	98	100	100	100	100	100		34	L	C	C	C	C	C
35	97	100	100	100	100	100		35	L	C	C	C	C	C
36	97	100	100	100	100	100		36	L	C	C	C	C	C
37	95	100	100	100	100	100		37	L	C	C	C	C	C
38	94	99	100	100	100	100		38	L	L	C	C	C	C
39	93	99	100	100	100	100		39	L	L	C	C	C	C
40	92	99	100	100	100	100		40	L	L	C	C	C	C
41	91	99	100	100	100	100		41	L	L	C	C	C	C
42	90	98	100	100	100	100		42	L	L	C	C	C	C
43	88	98	100	100	100	100		43	L	L	C	C	C	C
44	86	97	100	100	100	100		44	L	L	C	C	C	C
45	85	97	100	100	100	100		45	L	L	C	C	C	C
46	84	96	100	100	100	100		46	L	L	C	C	C	C
47	81	95	100	100	100	100		47	L	L	C	C	C	C
48	81	95	100	100	100	100		48	L	L	C	C	C	C
49	80	93	100	100	100	100		49	L	L	C	C	C	C
50	78	93	100	100	100	100		50	L	L	C	C	C	C
51	77	92	100	100	100	100		51	L	L	C	C	C	C
52	75	92	100	100	100	100		52	L	L	C	C	C	C
53	74	90	99	100	100	100		53	U	L	L	C	C	C
54	73	90	99	100	100	100		54	U	L	L	C	C	C
55	72	89	99	100	100	100		55	U	L	L	C	C	C
56	70	88	99	100	100	100		56	U	L	L	C	C	C
57	69	87	99	100	100	100		57	U	L	L	C	C	C
58	68	86	98	100	100	100		58	U	L	L	C	C	C
59	67	86	98	100	100	100		59	U	L	L	C	C	C
60	65	85	98	100	100	100		60	U	L	L	C	C	C
61	64	83	98	100	100	100		61	U	L	L	C	C	C
62	62	83	97	100	100	100		62	U	L	L	C	C	C
63	62	81	97	100	100	100		63	U	L	L	C	C	C
64	61	81	97	100	100	100		64	U	L	L	C	C	C
65	60	80	96	100	100	100		65	U	L	L	C	C	C
66	59	79	96	100	100	100		66	U	L	L	C	C	C
67	58	78	95	100	100	100		67	U	L	L	C	C	C
68	57	78	95	100	100	100		68	U	L	L	C	C	C
69	56	77	95	100	100	100		69	U	L	L	C	C	C
70	56	76	94	100	100	100		70	U	L	L	C	C	C
71	55	75	93	100	100	100		71	U	L	L	C	C	C
72	54	75	93	100	100	100		72	U	L	L	C	C	C
73	53	73	93	100	100	100		73	U	U	L	C	C	C
74	53	72	92	100	100	100		74	U	U	L	C	C	C
75	53	72	92	100	100	100		75	U	U	L	C	C	C
76	51	71	91	100	100	100		76	U	U	L	C	C	C
77	50	71	91	100	100	100		77	U	U	L	C	C	C
78	49	70	91	100	100	100		78	M	U	L	C	C	C
79	49	69	90	100	100	100		79	M	U	L	C	C	C
80	49	70	90	100	100	100		80	M	U	L	C	C	C
81	47	68	89	100	100	100		81	M	U	L	C	C	C
82	48	67	89	100	100	100		82	M	U	L	C	C	C
83	48	67	88	100	100	100		83	M	U	L	C	C	C
84	47	67	88	100	100	100		84	M	U	L	C	C	C
85	46	66	87	100	100	100		85	M	U	L	C	C	C
86	45	64	87	99	100	100		86	M	U	L	L	C	C
87	45	65	86	99	100	100		87	M	U	L	L	C	C
88	44	63	87	99	100	100		88	M	U	L	L	C	C
89	44	63	86	99	100	100		89	M	U	L	L	C	C
90	43	62	86	99	100	100		90	M	U	L	L	C	C
91	43	63	85	99	100	100		91	M	U	L	L	C	C
92	43	61	85	99	100	100		92	M	U	L	L	C	C
93	43	61	84	99	100	100		93	M	U	L	L	C	C
94	42	60	84	99	100	100		94	M	U	L	L	C	C
95	40	60	83	99	100	100		95	M	U	L	L	C	C
96	41	60	83	98	100	100		96	M	U	L	L	C	C
97	40	59	83	99	100	100		97	M	U	L	L	C	C
98	39	58	82	98	100	100		98	M	U	L	L	C	C
99	40	58	82	98	100	100		99	M	U	L	L	C	C
100	39	57	82	98	100	100		100	M	U	L	L	C	C
101	39	57	80	98	100	100		101	M	U	L	L	C	C
102	39	58	80	98	100	100		102	M	U	L	L	C	C
103	39	57	80	98	100	100		103	M	U	L	L	C	C
104	39	56	80	98	100	100		104	M	U	L	L	C	C
105	38	56	79	98	100	100		105	M	U	L	L	C	C
106	37	56	80	98	100	100		106	M	U	L	L	C	C
107	37	55	79	98	100	100		107	M	U	L	L	C	C
108	37	56	78	98	100	100		108	M	U	L	L	C	C
109	38	54	78	98	100	100		109	M	U	L	L	C	C
110	36	54	77	97	100	100		110	M	U	L	L	C	C
111	37	54	78	97	100	100		111	M	U	L	L	C	C
112	36	54	77	97	100	100		112	M	U	L	L	C	C
113	36	53	76	96	100	100		113	M	U	L	L	C	C
114	36	54	77	97	100	100		114	M	U	L	L	C	C
115	35	52	77	97	100	100		115	M	U	L	L	C	C
116	35	53	76	96	100	100		116	M	U	L	L	C	C
117	34	52	76	97	100	100		117	M	U	L	L	C	C
118	35	51	75	96	100	100		118	M	U	L	L	C	C
119	34	51	75	96	100	100		119	M	U	L	L	C	C
120	34	52	75	96	100	100		120	M	U	L	L	C	C
121	34	51	75	96	100	100		121	M	U	L	L	C	C
122	33	51	74	95	100	100		122	M	U	U	L	C	C
123	32	50	73	95	100	100		123	M	U	U	L	C	C
124	34	50	73	95	100	100		124	M	U	U	L	C	C
125	32	49	73	95	100	100		125	M	M	U	L	C	C
126	32	49	73	95	100	100		126	M	M	U	L	C	C
127	33	50	73	95	100	100		127	M	U	U	L	C	C
128	32	49	73	95	100	100		128	M	M	U	L	C	C
129	32	49	72	94	100	100		129	M	M	U	L	C	C
130	32	48	71	94	100	100		130	M	M	U	L	C	C
131	31	48	71	94	100	100		131	M	M	U	L	C	C
132	32	49	72	94	100	100		132	M	M	U	L	C	C
133	32	48	71	94	100	100		133	M	M	U	L	C	C
134	31	48	71	94	100	100		134	M	M	U	L	C	C
135	31	48	71	94	100	100		135	M	M	U	L	C	C
136	30	47	71	93	100	100		136	M	M	U	L	C	C
137	31	47	71	93	100	100		137	M	M	U	L	C	C
138	30	46	70	94	100	100		138	M	M	U	L	C	C
139	31	46	69	93	100	100		139	M	M	U	L	C	C
140	30	47	69	93	100	100		140	M	M	U	L	C	C
141	30	47	69	93	100	100		141	M	M	U	L	C	C
142	30	45	69	92	100	100		142	M	M	U	L	C	C
143	30	46	69	92	100	100		143	M	M	U	L	C	C
144	30	46	69	92	100	100		144	M	M	U	L	C	C
145	30	46	68	92	100	100		145	M	M	U	L	C	C
146	29	46	69	92	100	100		146	M	M	U	L	C	C
147	29	45	68	92	100	100		147	M	M	U	L	C	C
148	29	45	68	91	100	100		148	M	M	U	L	C	C
149	29	45	67	92	100	100		149	M	M	U	L	C	C
150	29	44	67	92	100	100		150	M	M	U	L	C	C
151	28	44	67	92	100	100		151	M	M	U	L	C	C
152	28	44	68	91	100	100		152	M	M	U	L	C	C
153	29	45	67	91	100	100		153	M	M	U	L	C	C
154	28	44	67	91	100	100		154	M	M	U	L	C	C
155	28	44	67	91	100	100		155	M	M	U	L	C	C
156	28	44	65	90	100	100		156	M	M	U	L	C	C
157	28	43	66	90	100	100		157	M	M	U	L	C	C
158	28	44	66	91	100	100		158	M	M	U	L	C	C
159	28	43	65	91	100	100		159	M	M	U	L	C	C
160	28	44	66	90	100	100		160	M	M	U	L	C	C
161	27	43	66	90	100	100		161	M	M	U	L	C	C
162	27	43	65	89	100	100		162	M	M	U	L	C	C
163	28	42	66	90	100	100		163	M	M	U	L	C	C
164	27	43	65	90	100	100		164	M	M	U	L	C	C
165	27	43	64	90	100	100		165	M	M	U	L	C	C
166	28	42	64	90	100	100		166	M	M	U	L	C	C
167	27	42	65	89	100	100		167	M	M	U	L	C	C
168	27	42	65	89	100	100		168	M	M	U	L	C	C
169	27	42	64	89	100	100		169	M	M	U	L	C	C
170	27	42	64	89	100	100		170	M	M	U	L	C	C
171	27	41	63	89	100	100		171	M	M	U	L	C	C
172	27	42	63	89	100	100		172	M	M	U	L	C	C
173	25	41	63	88	100	100		173	M	M	U	L	C	C
174	27	41	63	88	100	100		174	M	M	U	L	C	C
175	27	42	63	88	100	100		175	M	M	U	L	C	C
176	26	41	63	88	100	100		176	M	M	U	L	C	C
177	26	41	64	88	100	100		177	M	M	U	L	C	C
178	26	41	63	88	100	100		178	M	M	U	L	C	C
179	26	40	62	88	100	100		179	M	M	U	L	C	C
180	26	41	63	88	100	100		180	M	M	U	L	C	C
181	27	41	63	88	100	100		181	M	M	U	L	C	C
182	26	40	62	87	100	100		182	M	M	U	L	C	C
183	26	40	63	88	100	100		183	M	M	U	L	C	C
184	25	41	62	87	100	100		184	M	M	U	L	C	C
185	26	40	63	87	100	100		185	M	M	U	L	C	C
186	26	41	61	87	100	100		186	M	M	U	L	C	C
187	25	40	62	87	100	100		187	M	M	U	L	C	C
188	25	40	61	88	100	100		188	M	M	U	L	C	C
189	25	40	61	87	100	100		189	M	M	U	L	C	C
190	25	40	61	86	100	100		190	M	M	U	L	C	C
191	25	40	61	86	100	100		191	M	M	U	L	C	C
192	25	40	61	87	100	100		192	M	M	U	L	C	C
193	25	40	61	86	100	100		193	M	M	U	L	C	C
194	25	39	61	86	100	100		194	M	M	U	L	C	C
195	26	40	61	86	100	100		195	M	M	U	L	C	C
196	25	39	61	86	100	100		196	M	M	U	L	C	C
197	24	39	61	86	100	100		197	P	M	U	L	C	C
198	24	38	60	86	100	100		198	P	M	U	L	C	C
199	25	38	61	86	100	100		199	M	M	U	L	C	C
200	24	38	59	85	100	100		200	P	M	U	L	C	C

## Sheet: CdS
ENP Diameter (nm)/Zeta potential (mV)	-50	-40	-30	-20	-10	0			-50	-40	-30	-20	-10	0
1	100	100	100	100	100	100		1	C	C	C	C	C	C
2	100	100	100	100	100	100		2	C	C	C	C	C	C
3	100	100	100	100	100	100		3	C	C	C	C	C	C
4	100	100	100	100	100	100		4	C	C	C	C	C	C
5	100	100	100	100	100	100		5	C	C	C	C	C	C
6	100	100	100	100	100	100		6	C	C	C	C	C	C
7	100	100	100	100	100	100		7	C	C	C	C	C	C
8	100	100	100	100	100	100		8	C	C	C	C	C	C
9	100	100	100	100	100	100		9	C	C	C	C	C	C
10	100	100	100	100	100	100		10	C	C	C	C	C	C
11	100	100	100	100	100	100		11	C	C	C	C	C	C
12	100	100	100	100	100	100		12	C	C	C	C	C	C
13	100	100	100	100	100	100		13	C	C	C	C	C	C
14	100	100	100	100	100	100		14	C	C	C	C	C	C
15	100	100	100	100	100	100		15	C	C	C	C	C	C
16	100	100	100	100	100	100		16	C	C	C	C	C	C
17	100	100	100	100	100	100		17	C	C	C	C	C	C
18	100	100	100	100	100	100		18	C	C	C	C	C	C
19	100	100	100	100	100	100		19	C	C	C	C	C	C
20	100	100	100	100	100	100		20	C	C	C	C	C	C
21	100	100	100	100	100	100		21	C	C	C	C	C	C
22	100	100	100	100	100	100		22	C	C	C	C	C	C
23	100	100	100	100	100	100		23	C	C	C	C	C	C
24	100	100	100	100	100	100		24	C	C	C	C	C	C
25	99	100	100	100	100	100		25	L	C	C	C	C	C
26	99	100	100	100	100	100		26	L	C	C	C	C	C
27	98	100	100	100	100	100		27	L	C	C	C	C	C
28	98	100	100	100	100	100		28	L	C	C	C	C	C
29	97	100	100	100	100	100		29	L	C	C	C	C	C
30	97	99	100	100	100	100		30	L	L	C	C	C	C
31	96	99	100	100	100	100		31	L	L	C	C	C	C
32	96	99	100	100	100	100		32	L	L	C	C	C	C
33	95	99	100	100	100	100		33	L	L	C	C	C	C
34	94	99	100	100	100	100		34	L	L	C	C	C	C
35	92	98	100	100	100	100		35	L	L	C	C	C	C
36	92	98	100	100	100	100		36	L	L	C	C	C	C
37	92	98	100	100	100	100		37	L	L	C	C	C	C
38	89	97	100	100	100	100		38	L	L	C	C	C	C
39	89	97	100	100	100	100		39	L	L	C	C	C	C
40	88	96	100	100	100	100		40	L	L	C	C	C	C
41	88	96	100	100	100	100		41	L	L	C	C	C	C
42	86	95	99	100	100	100		42	L	L	L	C	C	C
43	85	95	99	100	100	100		43	L	L	L	C	C	C
44	84	94	99	100	100	100		44	L	L	L	C	C	C
45	83	94	99	100	100	100		45	L	L	L	C	C	C
46	82	93	99	100	100	100		46	L	L	L	C	C	C
47	81	93	99	100	100	100		47	L	L	L	C	C	C
48	81	92	99	100	100	100		48	L	L	L	C	C	C
49	80	92	99	100	100	100		49	L	L	L	C	C	C
50	79	91	99	100	100	100		50	L	L	L	C	C	C
51	77	90	98	100	100	100		51	L	L	L	C	C	C
52	76	90	98	100	100	100		52	L	L	L	C	C	C
53	76	89	98	100	100	100		53	L	L	L	C	C	C
54	75	87	98	100	100	100		54	L	L	L	C	C	C
55	74	88	98	100	100	100		55	U	L	L	C	C	C
56	73	87	97	100	100	100		56	U	L	L	C	C	C
57	72	86	97	100	100	100		57	U	L	L	C	C	C
58	71	86	97	100	100	100		58	U	L	L	C	C	C
59	71	85	96	100	100	100		59	U	L	L	C	C	C
60	70	85	96	100	100	100		60	U	L	L	C	C	C
61	70	83	96	100	100	100		61	U	L	L	C	C	C
62	69	83	95	100	100	100		62	U	L	L	C	C	C
63	67	83	95	100	100	100		63	U	L	L	C	C	C
64	68	82	95	100	100	100		64	U	L	L	C	C	C
65	67	82	95	100	100	100		65	U	L	L	C	C	C
66	66	81	94	100	100	100		66	U	L	L	C	C	C
67	65	82	95	100	100	100		67	U	L	L	C	C	C
68	64	80	94	100	100	100		68	U	L	L	C	C	C
69	64	79	93	100	100	100		69	U	L	L	C	C	C
70	64	79	93	100	100	100		70	U	L	L	C	C	C
71	63	78	93	100	100	100		71	U	L	L	C	C	C
72	62	78	93	100	100	100		72	U	L	L	C	C	C
73	62	78	92	100	100	100		73	U	L	L	C	C	C
74	61	78	92	99	100	100		74	U	L	L	L	C	C
75	61	76	92	99	100	100		75	U	L	L	L	C	C
76	62	76	92	99	100	100		76	U	L	L	L	C	C
77	60	75	91	99	100	100		77	U	L	L	L	C	C
78	60	75	90	99	100	100		78	U	L	L	L	C	C
79	60	75	91	99	100	100		79	U	L	L	L	C	C
80	59	74	90	99	100	100		80	U	U	L	L	C	C
81	59	74	90	99	100	100		81	U	U	L	L	C	C
82	58	73	89	99	100	100		82	U	U	L	L	C	C
83	57	73	89	99	100	100		83	U	U	L	L	C	C
84	57	72	90	99	100	100		84	U	U	L	L	C	C
85	57	73	89	99	100	100		85	U	U	L	L	C	C
86	56	71	89	99	100	100		86	U	U	L	L	C	C
87	56	72	89	99	100	100		87	U	U	L	L	C	C
88	56	72	88	99	100	100		88	U	U	L	L	C	C
89	56	71	88	99	100	100		89	U	U	L	L	C	C
90	55	71	88	98	100	100		90	U	U	L	L	C	C
91	56	70	87	98	100	100		91	U	U	L	L	C	C
92	54	70	87	99	100	100		92	U	U	L	L	C	C
93	54	69	87	99	100	100		93	U	U	L	L	C	C
94	54	70	87	98	100	100		94	U	U	L	L	C	C
95	53	69	86	98	100	100		95	U	U	L	L	C	C
96	54	69	86	98	100	100		96	U	U	L	L	C	C
97	52	68	86	98	100	100		97	U	U	L	L	C	C
98	52	68	86	98	100	100		98	U	U	L	L	C	C
99	53	68	85	98	100	100		99	U	U	L	L	C	C
100	52	67	85	98	100	100		100	U	U	L	L	C	C
101	50	67	84	98	100	100		101	U	U	L	L	C	C
102	51	67	85	98	100	100		102	U	U	L	L	C	C
103	51	66	84	97	100	100		103	U	U	L	L	C	C
104	52	67	84	98	100	100		104	U	U	L	L	C	C
105	51	65	84	97	100	100		105	U	U	L	L	C	C
106	51	65	84	97	100	100		106	U	U	L	L	C	C
107	50	65	83	97	100	100		107	U	U	L	L	C	C
108	49	65	83	97	100	100		108	M	U	L	L	C	C
109	49	64	83	97	100	100		109	M	U	L	L	C	C
110	49	64	84	97	100	100		110	M	U	L	L	C	C
111	48	64	83	97	100	100		111	M	U	L	L	C	C
112	49	64	83	97	100	100		112	M	U	L	L	C	C
113	49	64	82	97	100	100		113	M	U	L	L	C	C
114	49	64	82	97	100	100		114	M	U	L	L	C	C
115	48	64	82	97	100	100		115	M	U	L	L	C	C
116	49	63	81	97	100	100		116	M	U	L	L	C	C
117	48	63	82	97	100	100		117	M	U	L	L	C	C
118	47	62	81	97	100	100		118	M	U	L	L	C	C
119	47	62	81	97	100	100		119	M	U	L	L	C	C
120	47	62	81	96	100	100		120	M	U	L	L	C	C
121	47	62	81	97	100	100		121	M	U	L	L	C	C
122	46	63	80	96	100	100		122	M	U	L	L	C	C
123	47	62	80	96	100	100		123	M	U	L	L	C	C
124	47	61	80	96	100	100		124	M	U	L	L	C	C
125	46	60	79	96	100	100		125	M	U	L	L	C	C
126	46	60	79	96	100	100		126	M	U	L	L	C	C
127	46	62	80	96	100	100		127	M	U	L	L	C	C
128	45	61	80	95	100	100		128	M	U	L	L	C	C
129	46	61	79	95	100	100		129	M	U	L	L	C	C
130	46	60	79	95	100	100		130	M	U	L	L	C	C
131	45	61	79	95	100	100		131	M	U	L	L	C	C
132	45	60	79	95	100	100		132	M	U	L	L	C	C
133	45	60	79	95	100	100		133	M	U	L	L	C	C
134	46	60	78	95	100	100		134	M	U	L	L	C	C
135	45	60	79	95	100	100		135	M	U	L	L	C	C
136	45	61	79	94	100	100		136	M	U	L	L	C	C
137	44	59	79	95	100	100		137	M	U	L	L	C	C
138	44	59	78	95	100	100		138	M	U	L	L	C	C
139	45	59	77	95	100	100		139	M	U	L	L	C	C
140	44	59	77	94	100	100		140	M	U	L	L	C	C
141	44	58	78	94	100	100		141	M	U	L	L	C	C
142	44	58	77	94	100	100		142	M	U	L	L	C	C
143	44	58	77	94	100	100		143	M	U	L	L	C	C
144	44	58	77	94	100	100		144	M	U	L	L	C	C
145	44	59	77	94	100	100		145	M	U	L	L	C	C
146	44	58	77	94	100	100		146	M	U	L	L	C	C
147	45	58	77	94	100	100		147	M	U	L	L	C	C
148	43	57	77	94	100	100		148	M	U	L	L	C	C
149	43	58	76	94	100	100		149	M	U	L	L	C	C
150	43	57	76	94	100	100		150	M	U	L	L	C	C
151	43	57	77	94	100	100		151	M	U	L	L	C	C
152	42	58	76	94	100	100		152	M	U	L	L	C	C
153	43	57	76	94	100	100		153	M	U	L	L	C	C
154	43	56	75	94	100	100		154	M	U	L	L	C	C
155	43	57	75	93	100	100		155	M	U	L	L	C	C
156	44	57	76	93	100	100		156	M	U	L	L	C	C
157	42	56	76	93	100	100		157	M	U	L	L	C	C
158	42	56	75	93	100	100		158	M	U	L	L	C	C
159	42	56	76	93	100	100		159	M	U	L	L	C	C
160	42	56	74	93	100	100		160	M	U	U	L	C	C
161	42	57	75	93	100	100		161	M	U	L	L	C	C
162	42	56	74	93	100	100		162	M	U	U	L	C	C
163	41	56	75	93	100	100		163	M	U	L	L	C	C
164	42	55	74	93	100	100		164	M	U	U	L	C	C
165	41	55	75	92	100	100		165	M	U	L	L	C	C
166	41	56	74	93	100	100		166	M	U	U	L	C	C
167	41	56	74	93	100	100		167	M	U	U	L	C	C
168	42	56	76	93	100	100		168	M	U	L	L	C	C
169	42	55	74	93	100	100		169	M	U	U	L	C	C
170	41	56	74	93	100	100		170	M	U	U	L	C	C
171	41	56	74	92	100	100		171	M	U	U	L	C	C
172	41	54	74	92	100	100		172	M	U	U	L	C	C
173	40	55	74	92	100	100		173	M	U	U	L	C	C
174	41	54	73	92	100	100		174	M	U	U	L	C	C
175	40	55	73	92	100	100		175	M	U	U	L	C	C
176	41	54	73	92	100	100		176	M	U	U	L	C	C
177	41	54	73	92	100	100		177	M	U	U	L	C	C
178	40	55	73	92	100	100		178	M	U	U	L	C	C
179	40	55	72	92	100	100		179	M	U	U	L	C	C
180	40	55	73	92	100	100		180	M	U	U	L	C	C
181	40	53	72	92	100	100		181	M	U	U	L	C	C
182	40	54	73	91	100	100		182	M	U	U	L	C	C
183	40	54	73	92	100	100		183	M	U	U	L	C	C
184	40	54	73	92	100	100		184	M	U	U	L	C	C
185	40	54	72	92	100	100		185	M	U	U	L	C	C
186	39	54	72	91	100	100		186	M	U	U	L	C	C
187	40	54	72	91	100	100		187	M	U	U	L	C	C
188	40	54	72	91	100	100		188	M	U	U	L	C	C
189	40	55	72	91	100	100		189	M	U	U	L	C	C
190	40	53	72	91	100	100		190	M	U	U	L	C	C
191	39	54	73	91	100	100		191	M	U	U	L	C	C
192	40	53	72	91	100	100		192	M	U	U	L	C	C
193	39	53	72	91	100	100		193	M	U	U	L	C	C
194	40	54	72	91	100	100		194	M	U	U	L	C	C
195	39	54	72	91	100	100		195	M	U	U	L	C	C
196	39	52	72	90	100	100		196	M	U	U	L	C	C
197	39	54	72	90	100	100		197	M	U	U	L	C	C
198	38	53	70	91	100	100		198	M	U	U	L	C	C
199	39	54	72	91	100	100		199	M	U	U	L	C	C
200	39	53	72	90	100	100		200	M	U	U	L	C	C

[truncated: 28 more sheets: CeO2, Cr, Cu, CuO, Fe3O4, LiF, MgF2, MgO, Mo, MoS2, PbS, Pt, Si3N4, SiC, SiO2, SrTiO3, TiO2, V, W, WS2 …]
